# Supplementary material for: A Revised Time Tree of the Asterids: Establishing a Temporal Framework For Evolutionary Studies of the Coffee Family (Rubiaceae)
Source: PubMed Central journal article supplement (PMC4462594; doi:10.1371/journal.pone.0126690), 2015-05-21
Supplement: pone.0126690.s002.pdf [file pone.0126690.s002.pdf]

S1 Table – List of investigated taxa with accession numbers

S1 Table. List of investigated taxa with accession numbers. Voucher information is given for new sequences not previously reported and their accession numbers are indicated in bold. Standard herbarium codes follow Thiers (2008).

| Family/Group   | Tribe | Genus              | Species                                | Citation/Voucher           | <i>rbcL</i> | <i>ndhF</i> | <i>matK</i> | <i>trnV</i> | <i>rps16</i> | <i>trnL</i> |
|----------------|-------|--------------------|----------------------------------------|----------------------------|-------------|-------------|-------------|-------------|--------------|-------------|
| Acanthaceae    |       | <i>Acanthus</i>    | <i>Acanthus longifolius</i> Host       | Bremer et al. (2002)       |             |             | AJ429326    | AJ429679    | AH431037     | AJ430912    |
|                |       |                    | <i>Acanthus montanus</i> T.Anderson    | Hedrén et al. (1995)       | L12592      |             |             |             |              |             |
|                |       |                    |                                        | Bremer et al. (2002)       |             | AJ429115    |             |             |              |             |
|                |       | <i>Avicennia</i>   | <i>Avicennia marina</i> Vierh.         | Bremer et al. (2002)       |             | AJ429116    | AJ429327    | AJ429680    | AJ431038     | AJ430913    |
|                |       |                    | <i>Avicennia nitida</i> Jacq.          | Wagstaff & Olmstead (1997) | U28868      |             |             |             |              |             |
|                |       |                    |                                        |                            |             |             |             |             |              |             |
| Actinidiaceae  |       | <i>Actinidia</i>   | <i>Actinidia arguta</i> Miq.           | Albach et al. (2001a,b)    |             | AJ236238    |             |             |              |             |
|                |       |                    | <i>Actinidia chinensis</i> Planch.     | Albert et al. (1992)       | L01882      |             |             |             |              |             |
|                |       |                    | <i>Actinidia kolomikta</i> Maxim.      | Bremer et al. (2002)       |             | AJ429279    | AJ429640    | AJ430992    | AJ430869     |             |
| Adoxaceae      |       | <i>Viburnum</i>    | <i>Viburnum rhytidophyllum</i> Graebn. | Bremer et al. (2002)       |             |             | AJ429391    | AJ429736    | AJ431103     | AJ430979    |
|                |       |                    |                                        | Gustafsson et al. (1996)   | X87398      |             |             |             |              |             |
|                |       |                    |                                        | Oxelmann et al. (1999)     |             | AF027273    |             |             |              |             |
| Alseuosmiaceae |       | <i>Alseuosmia</i>  | <i>Alseuosmia macrophylla</i> A.Cunn.  | Bremer et al. (2002)       |             |             | AJ429378    | AJ429725    | AJ431091     | AJ430965    |
|                |       |                    |                                        | Gustafsson et al. (1996)   | X87377      |             |             |             |              |             |
|                |       |                    |                                        | Roels (unpublished)        |             | AF060157    |             |             |              |             |
| Apiaceae       |       | <i>Apium</i>       | <i>Apium graveolens</i> L.             | Bremer et al. (2002)       |             | AJ429124    | AJ429370    | AJ429716    | AJ431081     | AJ430956    |
|                |       |                    |                                        | Albert et al. (1992)       | L01885      |             |             |             |              |             |
| Apocynaceae    |       | <i>Alstonia</i>    | <i>Alstonia scholaris</i> (L.) R.Br.   | Bremer et al. (2002)       |             | AJ011982    | AJ429321    | AJ429674    | AJ431032     | AJ430907    |
|                |       |                    |                                        | Sennblad & Bremer (1996)   | X91760      |             |             |             |              |             |
| Aquifoliaceae  |       | <i>Ilex</i>        | <i>Ilex crenata</i> Thunb.             | Olmstead et al. (2000)     |             | AF130206    |             |             |              |             |
|                |       |                    | <i>Ilex mitis</i> (L.) Radlk.          | Manen et al. (1998)        | X98730      |             |             |             |              |             |
|                |       |                    | <i>Ilex</i> sp.                        | Bremer et al. (2002)       |             | AJ429376    | AJ429722    | AJ431088    | AJ430962     |             |
| Araliaceae     |       | <i>Aralia</i>      | <i>Aralia spinosa</i> L.               | Bremer et al. (2002)       |             | AJ429125    | AJ429371    | AJ429717    | AJ431082     | AJ430957    |
|                |       |                    |                                        | Chase et al. (1993)        | L11166      |             |             |             |              |             |
| Argophyllaceae |       | <i>Argophyllum</i> | <i>Argophyllum</i> sp.                 | Bremer et al. (2002)       |             |             | AJ429379    | AJ429726    | AJ431092     | AJ430966    |
|                |       |                    |                                        | Gustafsson et al. (1996)   | X87379      |             |             |             |              |             |
|                |       |                    |                                        | Kårehed et al. (1999)      |             | AJ238335    |             |             |              |             |
| Asteraceae     |       | <i>Helianthus</i>  | <i>Helianthus annuus</i> L.            | Bremer et al. (2002)       |             |             | AJ429380    | AJ429727    | AJ431093     | AJ430967    |
|                |       |                    |                                        | Kanevski et al. (1999)     | AF097517    |             |             |             |              |             |

S1 Table – List of investigated taxa with accession numbers

| Family/Group         | Tribe | Genus               | Species                                   | Citation/Voucher           | <i>rbcL</i>                     | <i>ndhF</i>            | <i>matK</i> | <i>trnV</i> | <i>rps16</i> | <i>trnL</i> |          |
|----------------------|-------|---------------------|-------------------------------------------|----------------------------|---------------------------------|------------------------|-------------|-------------|--------------|-------------|----------|
| Balsaminaceae        |       | <i>Impatiens</i>    | <i>Impatiens biflora</i> Walt.            | Kim & Jansen (1995)        |                                 | L39383                 |             |             |              |             |          |
|                      |       |                     |                                           | Olmstead et al. (2000)     |                                 | AF130210               |             |             |              |             |          |
|                      |       |                     |                                           | Bremer et al. (2002)       |                                 |                        | AJ429280    | AJ429641    | AJ430993     | AJ430870    |          |
| Bignoniaceae         |       | <i>Jacaranda</i>    | <i>Jacaranda mimosaeifolia</i> D.Don      | Morton et al. (1997)       | Z80197                          |                        |             |             |              |             |          |
|                      |       |                     |                                           | Bremer et al. (2002)       |                                 |                        | AJ429328    | AJ429681    | AJ431039     | AJ430914    |          |
|                      |       |                     |                                           | Spangler & Olmstead (1999) | AF102647                        | AF102631               |             |             |              |             |          |
| Boraginaceae         |       | <i>Borago</i>       | <i>Borago officinalis</i> L.              | Bremer et al. (2002)       |                                 |                        | AJ429308    | AJ429664    | AJ431019     | AJ430896    |          |
|                      |       |                     |                                           | Olmstead et al. (1992)     | L11680                          |                        |             |             |              |             |          |
|                      |       |                     |                                           | Olmstead & Reeves (1995)   |                                 | L36393                 |             |             |              |             |          |
| Bruniaceae           |       | <i>Brunia</i>       | <i>Brunia albiflora</i> Phillips          | Bremer et al. (2002)       |                                 |                        | AJ429361    | AJ429707    | AJ431072     | AJ430948    |          |
|                      |       |                     |                                           | Backlund & Bremer (1997)   | Y10674                          |                        |             |             |              |             |          |
|                      |       |                     |                                           | Roels (unpublished)        |                                 | AF060159               |             |             |              |             |          |
| Calyceraceae         |       | <i>Acicarpa</i>     | <i>Acicarpa tribuloides</i> Juss.         | Bremer et al. (2002)       |                                 |                        | AJ429129    | AJ429381    | AJ429728     | AJ431094    | AJ430968 |
|                      |       |                     |                                           | Gustafsson et al. (1996)   | X87376                          |                        |             |             |              |             |          |
|                      |       |                     |                                           | <i>Boopis</i>              | <i>Boopis anthemoides</i> Juss. | Michaels et al. (1993) | L13860      |             |              |             |          |
| Kim & Jansen (1995)  |       | L39384              |                                           |                            |                                 |                        |             |             |              |             |          |
| Bremer et al. (2002) |       |                     |                                           |                            |                                 |                        |             | AJ430969    |              |             |          |
| Caprifoliaceae       |       | <i>Lonicera</i>     | <i>Lonicera orientalis</i> Lam.           | Bremer et al. (2002)       |                                 |                        | AJ429382    | AJ429729    | AJ431095     |             |          |
|                      |       |                     |                                           | Bremer et al. (2002)       |                                 |                        | AJ430196    | AJ429737    | AJ431104     | AJ430980    |          |
|                      |       |                     |                                           | Gustafsson et al. (1996)   | X87389                          |                        |             |             |              |             |          |
| Cardiopteridaceae    |       | <i>Cardiopteris</i> | <i>Cardiopteris quinqueloba</i> Hassk.    | Oxelmann et al. (1999)     |                                 | AF027274               |             |             |              |             |          |
|                      |       |                     |                                           | Bremer et al. (2002)       |                                 |                        | AJ312963    | AJ429310    | AJ429665     | AJ431021    | AJ430898 |
|                      |       |                     |                                           | Savolainen et al. (2000a)  | AJ402936                        |                        |             |             |              |             |          |
| Clethraceae          |       | <i>Clethra</i>      | <i>Clethra alnifolia</i> L.               | Bremer et al. (2002)       |                                 |                        | AJ429281    | AJ429526    | AJ430994     | AJ430871    |          |
|                      |       |                     |                                           | Kron & Chase (1983)        | L12609                          |                        |             |             |              |             |          |
|                      |       |                     |                                           | Albach et al. (2001a,b)    |                                 | AJ236242               |             |             |              |             |          |
| Columelliaceae       |       | <i>Columellia</i>   | <i>Columellia oblonga</i> Ruiz and Pav.   | Bremer et al. (2002)       |                                 |                        | AJ429362    | AJ429708    | AJ431073     | AJ430949    |          |
|                      |       |                     |                                           | Backlund & Bremer (1997)   | Y10675                          |                        |             |             |              |             |          |
|                      |       |                     |                                           | Roels (unpublished)        |                                 | AF060160               |             |             |              |             |          |
|                      |       | <i>Desfontainia</i> | <i>Desfontainia spinosa</i> Ruiz and Pav. | Bremer et al. (2002)       |                                 |                        | AJ429363    | AJ429709    | AJ431074     | AJ430950    |          |

S1 Table – List of investigated taxa with accession numbers

| Family/Group     | Tribe | Genus      | Species                                         | Citation/Voucher               | <i>rbcL</i> | <i>ndhF</i> | <i>matK</i> | <i>trnV</i> | <i>rps16</i> | <i>trnL</i> |
|------------------|-------|------------|-------------------------------------------------|--------------------------------|-------------|-------------|-------------|-------------|--------------|-------------|
|                  |       |            |                                                 | Bremer et al. (1994)           | Z29670      |             |             |             |              |             |
|                  |       |            |                                                 | Oxelman et al. (1999)          |             | AJ011988    |             |             |              |             |
| Convolvulaceae   |       | Ipomoea    | <i>Ipomoea batatas</i> (L.) Lam.                | Bremer et al. (2002)           |             |             | AJ429355    | AJ429702    | AJ431071     | AJ430942    |
|                  |       |            | <i>Ipomoea coccinea</i> L.                      | Olmstead et al. (1993)         | L14400      | U08918      |             |             |              |             |
| Cornaceae        |       | Cornus     | <i>Cornus mas</i> L.                            | Bremer et al. (2002)           |             |             | AJ429275    | AJ429636    | AJ430988     | AJ430866    |
|                  |       |            |                                                 | Xiang et al. (1993)            | L11216      |             |             |             |              |             |
|                  |       |            |                                                 | Roels (unpublished)            |             | AF060161    |             |             |              |             |
| Cyrillaceae      |       | Cyrilla    | <i>Cyrilla racemiflora</i> L.                   | Bremer et al. (2002)           |             |             | AJ429282    | AJ429527    | AJ430995     | AJ430872    |
|                  |       |            |                                                 | Albert et al. (1992)           | L01900      |             |             |             |              |             |
|                  |       |            |                                                 | Anderberg et al. (2002)        |             | AF421051    |             |             |              |             |
| Diervillaceae    |       | Diervilla  | <i>Diervilla sessilifolia</i> Buckl.            | Bremer et al. (1994)           | Z29672      |             |             |             |              |             |
|                  |       |            |                                                 | Roels (unpublished)            |             | AF060164    |             |             |              |             |
|                  |       |            | <i>Diervilla rivularis</i> Gatt.                | Bremer et al. (2002)           |             |             | AJ429392    | AJ429738    | AJ431105     | AJ430981    |
| Dipentodontaceae |       | Dipentodon | <i>Dipentodon sinicus</i> Dunn                  | Bremer et al. (2002)           | AJ428890    | AJ429102    | AJ429273    | AJ429634    | AJ430986     | AJ430865    |
| Dipsacaceae      |       | Dipsacus   | <i>Dipsacus sativus</i> Garsault                | Bremer et al. (2002)           |             |             | AJ429393    | AJ429739    | AJ431106     | AJ430982    |
|                  |       |            |                                                 | Michaels et al. (1993)         | L13864      |             |             |             |              |             |
|                  |       |            |                                                 | Olmstead et al. (2000)         |             | AF130190    |             |             |              |             |
| Ebenaceae        |       | Diospyros  | <i>Diospyros kaki</i> Thunb.                    | Bremer et al. (2002)           |             |             | AJ430197    | AJ429642    | AJ430996     | AJ430874    |
|                  |       |            |                                                 | Morton et al. (1997)           | Z80185      |             |             |             |              |             |
|                  |       |            | <i>Diospyros texana</i> Scheele                 | Olmstead et al. (2000)         |             | AF130213    |             |             |              |             |
| Eremosynaceae    |       | Eremosyne  | <i>Eremosyne pectinata</i> Endl.                | Bremer et al. (2002)           |             | AJ429120    | AJ429364    | AJ429710    | AJ431075     | AJ430951    |
|                  |       |            |                                                 | Hibach-Jetter et al. (unpubl.) | L47969      |             |             |             |              |             |
| Escalloniaceae   |       | Escallonia | <i>Escallonia coquimbensis</i> Remy in Gay      | Morgan & Soltis (1993)         | L11183      |             |             |             |              |             |
|                  |       |            | <i>Escallonia x langleyensis</i> Vilm. and Bois | Roels (unpublished)            |             | AF060165    |             |             |              |             |
|                  |       |            | <i>Escallonia rubra</i> Pers.                   | Bremer et al. (2002)           |             |             | AJ429365    | AJ429711    | AJ431076     | AJ430952    |
| Fouquieriaceae   |       | Fouquieria | <i>Fouquieria digueti</i> I.M.Johnst.           | Bremer et al. (2002)           |             |             | AJ429285    | AJ429643    | AJ430998     | AJ430876    |
|                  |       |            | <i>Fouquieria splendens</i> Engelm.             | Olmstead et al. (1992)         | L11675      |             |             |             |              |             |
|                  |       |            |                                                 | Albach et al. (2001a,b)        |             | AJ236249    |             |             |              |             |
| Garryaceae       |       | Aucuba     | <i>Aucuba japonica</i> Thunb.                   | Bremer et al. (2002)           |             |             | AJ429318    | AJ429672    | AJ431029     | AJ430906    |

S1 Table – List of investigated taxa with accession numbers

| Family/Group  | Tribe | Genus              | Species                                                 | Citation/Voucher                                          | <i>rbcL</i>                                     | <i>ndhF</i>          | <i>matK</i> | <i>trnV</i> | <i>rps16</i> | <i>trnL</i> |          |          |
|---------------|-------|--------------------|---------------------------------------------------------|-----------------------------------------------------------|-------------------------------------------------|----------------------|-------------|-------------|--------------|-------------|----------|----------|
| Gelsemiaceae  |       | <i>Gelsemium</i>   | <i>Gelsemium sempervirens</i> Ait.                      | Xiang et al. (1993)                                       | L11210                                          |                      |             |             |              |             |          |          |
|               |       |                    |                                                         | Roels (unpublished)                                       |                                                 | AF060158             |             |             |              |             |          |          |
|               |       |                    |                                                         | Bremer et al. (2002)                                      |                                                 | AJ429322             | AJ429675    | AJ431033    | AJ430908     |             |          |          |
|               |       |                    |                                                         | Olmstead et al. (1993)                                    | L14397                                          |                      |             |             |              |             |          |          |
| Gentianaceae  |       | <i>Gentiana</i>    | <i>Gentiana procera</i> Holm                            | Oxelmann et al. (1999)                                    |                                                 | AJ011984             |             |             |              |             |          |          |
|               |       |                    |                                                         | Olmstead et al. (1993)                                    | L14398                                          |                      |             |             |              |             |          |          |
|               |       |                    |                                                         | Olmstead & Reeves (1995)                                  |                                                 | L36400               |             |             |              |             |          |          |
| Gesneriaceae  |       | <i>Peltanthera</i> | <i>Peltanthera floribunda</i> Benth.                    | Bremer et al. (2002)                                      |                                                 |                      | AJ429323    | AJ429676    | AJ431034     | AJ430909    |          |          |
|               |       |                    |                                                         | Bremer et al. (2002)                                      |                                                 |                      | AJ429330    | AJ429682    | AJ431041     | AJ430916    |          |          |
|               |       |                    |                                                         | Oxelmann et al. (1999)                                    | AJ001762                                        | AF027281             |             |             |              |             |          |          |
|               |       |                    |                                                         | <i>Streptocarpus</i>                                      | <i>Streptocarpus caulescens</i> Vatke           | Bremer et al. (2002) |             |             | AJ429331     | AJ429684    | AJ431043 | AJ430918 |
| Goodeniaceae  |       | <i>Scaevola</i>    | <i>Scaevola frutescens</i> K.Krause                     | Olmstead et al. (1993)                                    | L14409                                          |                      |             |             |              |             |          |          |
|               |       |                    |                                                         | Olmstead & Reeves (1995)                                  |                                                 | L36415               |             |             |              |             |          |          |
|               |       |                    |                                                         | Michaels et al. (1993)                                    | L13932                                          |                      |             |             |              |             |          |          |
|               |       |                    |                                                         | Kim & Jansen (1995)                                       |                                                 | L39385               |             |             |              |             |          |          |
|               |       |                    |                                                         | Bremer et al. (2002)                                      |                                                 |                      | AJ429385    | AJ429730    | AJ431097     | AJ430973    |          |          |
| Griselinaceae |       | <i>Griselinia</i>  | <i>Griselinia littoralis</i> (Raoul) Raoul              | Bremer et al. (2002)                                      |                                                 |                      | AJ429372    | AJ429719    | AJ431084     | AJ430958    |          |          |
|               |       |                    |                                                         | <i>Griselinia lucida</i> (J.R.Forst. and G.Forst) G.Forst | Xiang et al. (1993)                             | L11225               |             |             |              |             |          |          |
|               |       |                    |                                                         | Olmstead et al. (2000)                                    |                                                 |                      | AF130205    |             |              |             |          |          |
| Grubbiaceae   |       | <i>Grubbia</i>     | <i>Grubbia rosmarinifolia</i> Berg.                     | Bremer et al. (2002)                                      |                                                 | AJ429104             | AJ429276    | AJ429637    | AJ430989     | AJ430867    |          |          |
|               |       |                    |                                                         | <i>Grubbia tomentosa</i> (Thunb.) Harms                   | Morton et al. (1996)                            | Z83141               |             |             |              |             |          |          |
| Helwingiaceae |       | <i>Helwingia</i>   | <i>Helwingia japonica</i> (Thunb. ex Murray) F.Dietrich | Bremer et al. (2002)                                      |                                                 |                      | AJ430195    | AJ429723    | AJ431089     | AJ430963    |          |          |
|               |       |                    |                                                         | Xiang et al. (1993)                                       | L11226                                          |                      |             |             |              |             |          |          |
| Icacinaeae    |       | <i>Apodytes</i>    | <i>Apodytes dimidiata</i> E.Mey. ex Bernh.              | Olmstead et al. (2000)                                    |                                                 | AF130207             |             |             |              |             |          |          |
|               |       |                    |                                                         | Bremer et al. (2002)                                      | AJ428895                                        | AJ429109             | AJ429311    | AJ429666    | AJ431022     | AJ430899    |          |          |
|               |       |                    |                                                         | <i>Cassinopsis</i>                                        | <i>Cassinopsis ilicifolia</i> (Hochst.) Sleumer | Bremer et al. (2002) | AJ428896    | AJ429110    | AJ429312     | AJ429667    | AJ431023 | AJ430900 |
|               |       |                    |                                                         | <i>Icacina</i>                                            | <i>Icacina senegalensis</i> Juss.               | Bremer et al. (2002) | AJ428897    | AJ429111    | AJ429313     | AJ429668    | AJ431024 | AJ430901 |
|               |       |                    |                                                         | <i>Pyrenacantha</i>                                       | <i>Pyrenacantha grandifolia</i> Engl.           | Bremer et al. (2002) |             |             | AJ429314     | AJ429669    | AJ431025 | AJ430902 |

S1 Table – List of investigated taxa with accession numbers

| Family/Group   | Tribe | Genus               | Species                                         | Citation/Voucher            | <i>rbcL</i> | <i>ndhF</i> | <i>matK</i> | <i>trnV</i> | <i>rps16</i> | <i>trnL</i> |
|----------------|-------|---------------------|-------------------------------------------------|-----------------------------|-------------|-------------|-------------|-------------|--------------|-------------|
|                |       |                     | <i>Pyrenacantha malvaefolia</i> Engl.           | Savolainen et al. (2000a,b) | AJ402995    |             |             |             |              |             |
|                |       |                     |                                                 | Kårehed (2001)              |             | AJ312952    |             |             |              |             |
| Lamiaceae      |       | <i>Lamium</i>       | <i>Lamium album</i> L.                          | Bremer et al. (2002)        |             |             | AJ429332    | AJ429685    | AJ431044     | AJ430919    |
|                |       |                     | <i>Lamium purpureum</i> L.                      | Kaufmann & Wink (1996)      | Z37403      |             |             |             |              |             |
|                |       |                     |                                                 | Wagstaff & Olmstead (1997)  |             | U78694      |             |             |              |             |
| Lecythidaceae  |       | <i>Barringtonia</i> | <i>Barringtonia asiatica</i> (L.) Kurz          | Bremer et al. (2002)        |             |             | AJ429286    | AJ429644    | AJ430999     | AJ430877    |
|                |       |                     |                                                 | Morton et al. (1997)        | Z80174      |             |             |             |              |             |
|                |       |                     |                                                 | Anderberg et al. (2002)     |             | AF421044    |             |             |              |             |
| Linnaeaceae    |       | <i>Linnaea</i>      | <i>Linnaea borealis</i> L.                      | Bremer et al. (2002)        | AJ428899    |             | AJ429394    | AJ429740    | AJ431107     | AJ430983    |
|                |       |                     |                                                 | Roels (unpublished)         |             | AF060166    |             |             |              |             |
| Loasaceae      |       | <i>Loasa</i>        | <i>Loasa loxensis</i> Humb. Bonpl. and Kunth    | Hempel et al. (1995)        | U17876      |             |             |             |              |             |
|                |       |                     | <i>Loasa triphylla</i> Juss.                    | Bremer et al. (2002)        |             |             | AJ429278    | AJ429639    | AJ430991     | AJ430868    |
|                |       |                     | <i>Loasa vulcanica</i> André                    | Roels (unpublished)         |             | AF060167    |             |             |              |             |
| Loganiaceae    |       | <i>Logania</i>      | <i>Logania</i> sp.                              | Backlund et al. (2000)      |             | AJ235837    |             |             |              |             |
|                |       |                     | <i>Logania vaginalis</i> F.Muell.               | Bremer et al. (2002)        |             |             | AJ429324    | AJ429677    | AJ431035     | AJ430910    |
|                |       |                     |                                                 | Bremer (1996)               | Z68826      |             |             |             |              |             |
| Marcgraviaceae |       | <i>Marcgravia</i>   | <i>Marcgravia rectiflora</i> Triana and Planch. | Morton et al. (1996)        | Z83148      |             |             |             |              |             |
|                |       |                     |                                                 | Albach et al. (2001a,b)     |             | AJ236263    |             |             |              |             |
|                |       |                     | <i>Marcgravia</i> sp.                           | Bremer et al. (2002)        |             |             | AJ429289    | AJ429646    | AJ431001     | AJ430879    |
| Martyniaceae   |       | <i>Proboscidea</i>  | <i>Proboscidea fragrans</i> (Lindl.) Decne.     | Bremer et al. (2002)        |             |             | AJ429334    | AJ430388    | AJ431046     | AJ430921    |
|                |       |                     | <i>Proboscidea louisianica</i> (Mill.) Thell.   | Albert et al. (1992)        | L01946      |             |             |             |              |             |
|                |       |                     |                                                 | Albach et al. (2001a,b)     |             | AJ236267    |             |             |              |             |
| Menyanthaceae  |       | <i>Menyanthes</i>   | <i>Menyanthes trifoliata</i> L.                 | Bremer et al. (2002)        |             |             | AJ429386    | AJ429731    | AJ431098     | AJ430974    |
|                |       |                     |                                                 | Olmstead et al. (1993)      | L14006      |             |             |             |              |             |
|                |       |                     |                                                 | Kim & Jansen (1995)         |             | L39388      |             |             |              |             |
| Montiniaceae   |       | <i>Grevea</i>       | <i>Grevea</i> sp.                               | Bremer et al. (2002)        | AJ428898    | AJ430426    | AJ429357    | AJ429704    | AJ431066     | AJ430944    |
|                |       | <i>Kaliphora</i>    | <i>Kaliphora madagascariensis</i> Hook.f .      | Bremer et al. (2002)        |             | AJ431206    | AJ429358    | AJ429705    | AJ431067     | AJ430945    |
|                |       |                     |                                                 | Savolainen et al. (2000a)   | AJ402963    |             |             |             |              |             |
|                |       | <i>Montinia</i>     | <i>Montinia caryophyllacea</i> Thunb.           | Bremer et al. (2002)        |             |             | AJ429359    | AJ429706    | AJ431068     | AJ430946    |

S1 Table – List of investigated taxa with accession numbers

| Family/Group       | Tribe | Genus               | Species                                         | Citation/Voucher            | <i>rbcL</i> | <i>ndhF</i> | <i>matK</i> | <i>trnV</i> | <i>rps16</i> | <i>trnL</i>          |
|--------------------|-------|---------------------|-------------------------------------------------|-----------------------------|-------------|-------------|-------------|-------------|--------------|----------------------|
|                    |       |                     |                                                 | Morgan & Soltis (1993)      | L11194      |             |             |             |              |                      |
|                    |       |                     |                                                 | Olmstead et al. (2000)      |             | AF130178    |             |             |              |                      |
| Morinaceae         |       | <i>Morina</i>       | <i>Morina coulteriana</i> Royle                 |                             |             | AJ429130    | AJ429395    | AJ429741    | AJ431108     | AJ430984             |
|                    |       |                     |                                                 | Backlund & Bremer (1997)    | Y10706      |             |             |             |              |                      |
| Myrsinaceae        |       | <i>Myrsine</i>      | <i>Myrsine africana</i> L.                      | Bremer et al. (2002)        |             |             | AJ429290    | AJ429647    | AJ431002     | AJ430880             |
|                    |       |                     |                                                 | Anderberg et al. (1998)     | U96652      |             |             |             |              |                      |
|                    |       |                     |                                                 | Källersjö et al. (2000)     |             | AF213751    |             |             |              |                      |
| Oleaceae           |       | <i>Olea</i>         | <i>Olea europaea</i> L.                         | Bremer et al. (2002)        |             |             | AJ429335    | AJ429687    | AJ431047     | AJ430922             |
|                    |       |                     |                                                 | Oxelmann et al. (1999)      | AJ001766    | AF027288    |             |             |              |                      |
| Oncothecaceae      |       | <i>Oncotheca</i>    | <i>Oncotheca balansae</i> Baill.                | Bremer et al. (2002)        |             | AJ429114    | AJ429320    | AJ429673    | AJ431031     | AJ430529<br>AJ430530 |
|                    |       |                     |                                                 | Savolainen et al. (2000a,b) | AJ131950    |             |             |             |              |                      |
| Orbanchaceae       |       | <i>Cyclocheilon</i> | <i>Cyclocheilon somaliense</i> Oliver           | Bremer et al. (2002)        |             | AJ429117    | AJ429336    | AJ429688    | AJ431048     | AJ430923             |
|                    |       |                     |                                                 | Wagstaff & Olmstead (1997)  | U28871      |             |             |             |              |                      |
|                    |       | <i>Lindenbergia</i> | <i>Lindenbergia</i> sp.                         | Bremer et al. (2002)        |             |             | AJ429337    | AJ429689    | AJ431049     | AJ430924             |
|                    |       |                     |                                                 | Oxelmann et al. (1999)      | AJ001768    | AF027286    |             |             |              |                      |
| Paeoniaceae        |       | <i>Paeonia</i>      | <i>Paeonia suffruticosa</i> Andr.               | Savolainen et al. (2000a,b) | AJ402982    |             |             |             |              |                      |
|                    |       |                     | <i>Paeonia anomala</i> L.                       | Olmstead et al. (2000)      |             | AF130223    |             |             |              |                      |
|                    |       |                     | <i>Paeonia veitchii</i> Lynch                   | Bremer et al. (2002)        |             |             | AJ430198    | AJ430199    | AJ430201     | AJ430200             |
| Paracryphiaceae    |       | <i>Paracryphia</i>  | <i>Paracryphia alticola</i> (Schltr.) v.Steenis | Bremer et al. (2002)        |             | AJ429121    | AJ429367    | AJ429713    | AJ431078     | AJ430392             |
|                    |       |                     |                                                 | Savolainen et al. (2000a,b) | AJ402983    |             |             |             |              |                      |
|                    |       | <i>Quintinia</i>    | <i>Quintinia verdonii</i> F.Muell               | Bremer et al. (2002)        |             |             | AJ429366    | AJ429712    | AJ431077     | AJ430953             |
|                    |       |                     |                                                 | Gustafsson et al. (1996)    | X87394      |             |             |             |              |                      |
|                    |       |                     |                                                 | Kårehed et al. (1999)       |             | AJ238344    |             |             |              |                      |
| Paulowniaceae      |       | <i>Paulownia</i>    | <i>Paulownia tomentosa</i> (Thunb.) Steud.      | Bremer et al. (2002)        |             |             | AJ429339    | AJ429690    | AJ431051     | AJ430926             |
|                    |       |                     |                                                 | Olmstead & Reeves (1995)    | L36447      | L36406      |             |             |              |                      |
| Pedaliaceae        |       | <i>Sesamum</i>      | <i>Sesamum indicum</i> L.                       | Olmstead et al. (1993)      | L14408      |             |             |             |              |                      |
|                    |       |                     |                                                 | Olmstead & Reeves (1995)    |             | L36413      |             |             |              |                      |
|                    |       |                     | <i>Sesamum orientale</i> L.                     | Bremer et al. (2002)        |             |             | AJ429340    | AJ429691    | AJ431052     | AJ430927             |
| Pentaphragmataceae |       | <i>Pentaphragma</i> | <i>Pentaphragma ellipticum</i> Poulsen          | Bremer et al. (2002)        |             |             | AJ429387    | AJ429732    | AJ431099     | AJ430975             |

S1 Table – List of investigated taxa with accession numbers

| Family/Group      | Tribe | Genus              | Species                                        | Citation/Voucher            | <i>rbcL</i> | <i>ndhF</i> | <i>matK</i> | <i>trnV</i> | <i>rps16</i> | <i>trnL</i> |
|-------------------|-------|--------------------|------------------------------------------------|-----------------------------|-------------|-------------|-------------|-------------|--------------|-------------|
|                   |       |                    |                                                | Cosner et al. (1994)        | L18794      |             |             |             |              |             |
|                   |       |                    |                                                | Olmstead et al. (2000)      |             | AF130183    |             |             |              |             |
| Phellinaceae      |       | <i>Phelline</i>    | <i>Phelline comosa</i> Labill.                 | Kårehed et al. (1999)       |             | AJ238342    |             |             |              |             |
|                   |       |                    | <i>Phelline lucida</i> Vieill. ex Baill.       | Bremer et al. (2002)        |             |             | AJ429388    | AJ429733    | AJ431100     | AJ430976    |
|                   |       |                    |                                                | Kårehed et al. (1999)       | AJ238347    |             |             |             |              |             |
| Phrymaceae        |       | <i>Phryma</i>      | <i>Phryma leptostachya</i> L.                  | Bremer et al. (2002)        |             | AJ429118    | AJ429341    | AJ429692    | AJ431053     | AJ430928    |
|                   |       |                    |                                                | Wagstaff & Olmstead (1997)  | U28881      |             |             |             |              |             |
| Phyllonomaceae    |       | <i>Phyllonoma</i>  | <i>Phyllonoma laticuspis</i> Engl.             | Morgan & Soltis (1993)      | L11201      |             |             |             |              |             |
|                   |       |                    |                                                | Olmstead et al. (2000)      |             | AF130208    |             |             |              |             |
|                   |       |                    | <i>Phyllonoma ruscifolia</i> Willd. ex Schult. | Bremer et al. (2002)        |             |             | AJ429377    | AJ429724    | AJ431090     | AJ430964    |
| Pittosporaceae    |       | <i>Pittosporum</i> | <i>Pittosporum tobira</i> Dryand. ex Ait.      | Plunkett et al. (1996)      | U50261      |             |             |             |              |             |
|                   |       |                    |                                                | Olmstead et al. (2000)      |             | AF130201    |             |             |              |             |
|                   |       |                    | <i>Pittosporum undulatum</i> Vent.             | Bremer et al. (2002)        |             |             | AJ429374    | AJ429720    | AJ431086     | AJ430960    |
| Plantaginaceae    |       | <i>Antirrhinum</i> | <i>Antirrhinum majus</i> L.                    | Bremer et al. (2002)        |             |             | AJ429342    | AJ429693    | AJ431054     | AJ430929    |
|                   |       |                    |                                                | Olmstead et al. (1992)      | L11688      |             |             |             |              |             |
|                   |       |                    |                                                | Olmstead & Reeves (1995)    |             | L36392      |             |             |              |             |
|                   |       | <i>Globularia</i>  | <i>Globularia cordifolia</i> L.                | Bremer et al. (2002)        |             |             | AJ429343    | AJ429694    | AJ431055     | AJ430930    |
|                   |       |                    |                                                | Oxelman et al. (1999)       | AJ001764    | AF027282    |             |             |              |             |
|                   |       | <i>Plantago</i>    | <i>Plantago lanceolata</i> L.                  | Olmstead & Reeves (1995)    | L36454      | L36408      |             |             |              |             |
|                   |       |                    | <i>Plantago argentea</i> Chaix                 | Bremer et al. (2002)        |             |             | AJ429344    | AJ429695    | AJ431056     | AJ430931    |
| Plocospermataceae |       | <i>Plocosperma</i> | <i>Plocosperma buxifolium</i> Benth.           | Bremer et al. (2002)        |             |             | AJ429315    | AJ429670    | AJ431026     | AJ430903    |
|                   |       |                    |                                                | Endress et al. (1996)       | Z68829      |             |             |             |              |             |
|                   |       |                    |                                                | Oxelman et al. (1999)       |             | AJ011985    |             |             |              |             |
| Polemoniaceae     |       | <i>Polemonium</i>  | <i>Polemonium reptans</i> L.                   | Olmstead et al. (1992)      | L11687      |             |             |             |              |             |
|                   |       |                    | <i>Polemonium caeruleum</i> L.                 | Anderberg et al. (2002)     |             | AF421070    |             |             |              |             |
|                   |       |                    | <i>Polemonium pulcherrimum</i> Hook.           | Bremer et al. (2002)        |             |             | AJ429292    | AJ429649    | AJ431004     | AJ430882    |
| Polyosmaceae      |       | <i>Polyosma</i>    | <i>Polyosma cunninghamii</i> Benn.             | Bremer et al. (2002)        |             | AJ429122    | AJ429368    | AJ429714    | AJ431079     | AJ430954    |
|                   |       |                    |                                                | Savolainen et al. (2000a,b) | AJ402992    |             |             |             |              |             |
| Primulaceae       |       | <i>Primula</i>     | <i>Primula sieboldi</i> E.Morr                 | Anderberg et al. (1998)     | U96657      |             |             |             |              |             |
|                   |       |                    |                                                | Källersjö et al. (2000)     |             | AF213757    |             |             |              |             |

S1 Table – List of investigated taxa with accession numbers

| Family/Group   | Tribe                  | Genus                                              | Species                           | Citation/Voucher                       | <i>rbcL</i> | <i>ndhF</i>          | <i>matK</i> | <i>trnV</i> | <i>rps16</i> | <i>trnL</i> |  |
|----------------|------------------------|----------------------------------------------------|-----------------------------------|----------------------------------------|-------------|----------------------|-------------|-------------|--------------|-------------|--|
| Roridulaceae   |                        | <i>Roridula</i>                                    | <i>Primula veris</i> L.           | Bremer et al. (2002)                   |             |                      | AJ429293    | AJ429650    | AJ431005     | AJ430883    |  |
|                |                        |                                                    | <i>Roridula gorgonias</i> Planch. | Bremer et al. (2002)                   |             |                      | AJ429294    | AJ429651    | AJ431006     | AJ430884    |  |
| Rousseaceae    |                        | <i>Roussea</i>                                     | <i>Roussea simplex</i> Sm.        | Albert et al. (1992)                   | L01950      |                      |             |             |              |             |  |
|                |                        |                                                    |                                   | Albach et al. (2001a,b)                |             | AJ236270             |             |             |              |             |  |
|                |                        |                                                    |                                   | Bremer et al. (2002)                   |             | AJ429389             | AJ429734    | AJ431101    | AJ430977     |             |  |
| Rubiaceae      | Airospermeae           | <i>Boholia</i>                                     | <i>Boholia nematostylis</i> Merr. | Koontz & Soltis (1999)                 | AF084477    |                      |             |             |              |             |  |
|                |                        |                                                    |                                   | Lundberg (2001)                        |             | AJ277384             |             |             |              |             |  |
|                |                        |                                                    |                                   | Bicknell 1561A (S)                     |             | LN680343             | LN680278    |             |              |             |  |
|                | Alberteae              | <i>Alberta</i>                                     | <i>Alberta magna</i> E.Mey.       | Bremer & Eriksson (2009)               | AM117210    |                      |             |             |              | AM117286    |  |
|                |                        |                                                    |                                   | Kainulainen et al. (2009)              |             | AM949848             |             |             |              |             |  |
|                |                        |                                                    |                                   | Kainulainen et al. (2013)              |             |                      |             |             |              | HM164312    |  |
|                |                        |                                                    |                                   | Middleton s.n. 941013/Tonkin 200 (UPS) |             | LN680336             | LN680272    |             |              |             |  |
|                |                        |                                                    |                                   | Andreasen et al. (1999)                | Y18708      |                      |             |             |              |             |  |
|                |                        |                                                    |                                   | Bremer et al. (1999)                   |             | AJ236282             |             |             |              |             |  |
|                |                        |                                                    |                                   | Kainulainen et al. (2009)              |             |                      |             |             | FM204701     |             |  |
| Aleisanthieae  | <i>Aleisanthiopsis</i> | <i>Aleisanthiopsis distantiflora</i> (Merr.) Tange | Lantz & Bremer (2004)             |                                        |             |                      |             |             |              | AJ620118    |  |
|                |                        |                                                    | Tange 46977 (AAU)                 |                                        | LN680337    | LN680273             |             |             |              |             |  |
|                |                        |                                                    | Kainulainen et al. (2013)         | HM164154                               | HM164350    |                      |             |             | HM164306     |             |  |
| Anthospermeae  | <i>Anthospermum</i>    | <i>Anthospermum herbaceum</i> L.f.                 | Rova (unpublished)                |                                        |             |                      |             |             | AF242903     |             |  |
|                |                        |                                                    | Bremer 3093 (UPS)                 |                                        | LN680339    | LN680318<br>LN680330 |             |             |              |             |  |
| Argostemmateae | <i>Argostemma</i>      | <i>Argostemma hookeri</i> King                     | Bremer et al. (1995)              | X83623                                 |             |                      |             |             |              |             |  |
|                |                        |                                                    | Bremer et al. (1999)              |                                        | AJ236284    |                      |             |             |              |             |  |
|                |                        |                                                    | Rydin et al. (2008)               |                                        |             |                      |             | EU145496    | EU145544     |             |  |
|                |                        |                                                    | Wanntorp BB 88-27                 |                                        | LN680340    | LN680275             |             |             |              |             |  |
|                |                        |                                                    | Bremer (1996)                     | Z68788                                 |             |                      |             |             |              |             |  |
|                |                        |                                                    | Rydin et al. (2009)               |                                        | FJ695287    |                      |             | FJ695255    |              |             |  |
|                |                        |                                                    | Rydin et al. (2008)               |                                        |             |                      |             |             | EU145545     |             |  |

S1 Table – List of investigated taxa with accession numbers

| Family/Group     | Tribe                                     | Genus                                                  | Species                            | Citation/Voucher | <i>rbcL</i> | <i>ndhF</i> | <i>matK</i> | <i>trnV</i> | <i>rps16</i> | <i>trnL</i> |
|------------------|-------------------------------------------|--------------------------------------------------------|------------------------------------|------------------|-------------|-------------|-------------|-------------|--------------|-------------|
| Augusteae        | <i>Augusta</i>                            | <i>Augusta austrocaledonica</i> (Brongn.) J.H. Kirkbr. | Mouly & Innocente 237 (P)          |                  |             |             | LN680341    | LN680276    |              |             |
|                  |                                           |                                                        | Mouly et al. (2009)                | EU817412         |             |             |             |             |              | EU817454    |
|                  |                                           |                                                        | Kainulainen et al. (2013)          |                  | HM164352    |             |             |             |              | HM164193    |
| Bertiereae       | <i>Bertiera</i>                           | <i>Bertiera longithyrsa</i> Baker                      | Kårehed et al. 256 (UPS)           |                  |             |             | LN680342    | LN680277    |              |             |
|                  |                                           |                                                        | Kainulainen et al. (2013)          | HM164158         | HM164356    |             |             |             |              | HM164196    |
| Chioccoceae      | <i>Cubanola</i>                           | <i>Cubanola domingensis</i> (Britton) Aiello           | McDowell 001 (??)                  |                  |             |             | LN680349    | LN680311    |              |             |
|                  |                                           |                                                        | Bremer et al. (1995)               | X83632           |             |             |             |             |              |             |
|                  |                                           |                                                        | Bremer & Eriksson (2009)           |                  | AM117345    |             |             |             |              |             |
|                  |                                           |                                                        | Kainulainen et al. (2009)          |                  |             |             |             |             |              | FM204718    |
|                  |                                           |                                                        | Manns & Bremer (2010)              |                  |             |             |             |             |              | GQ852490    |
| Cinchoneae       | <i>Cinchona</i>                           | <i>Cinchona pubescens</i> Vahl                         | Bremer 2733 (S)                    |                  |             |             | LN680344    | LN680280    |              |             |
|                  |                                           |                                                        | Bremer et al. (1995)               | X83630           |             |             |             |             |              |             |
|                  |                                           |                                                        | Backlund et al. (2000)             |                  | AJ235843    |             |             |             |              |             |
|                  |                                           |                                                        | Kainulainen et al. (2009)          |                  |             |             |             |             |              | FM204714    |
|                  |                                           |                                                        | Andersson & Antonelli (2005)       |                  |             |             |             |             |              | AY538451    |
| Coffeae          | <i>Coffea</i>                             | <i>Coffea arabica</i> L.                               | Nalapalli et al. (unpublished)     | EF044213         | EF044213    | EF044213    | EF044213    | EF044213    | EF044213     |             |
| Colletocemateae  | <i>Colletocema</i>                        | <i>Colletocema dewevrei</i> (De Wild.) E.M.A. Petit    | Lisowski 47195 (K)                 |                  |             |             | LN680345    | LN680319    |              |             |
|                  |                                           |                                                        |                                    |                  |             |             | LN680331    |             |              |             |
|                  |                                           |                                                        | Rydin et al. (2008)                | EU145457         | EU145409    |             |             |             |              | EU145532    |
| Condamineae      | <i>Condaminea</i>                         | <i>Condaminea corymbosa</i> (Ruiz & Pav.) DC.          | Piesschaert et al. (2000)          |                  |             |             |             |             | AF129272     |             |
|                  |                                           |                                                        | T.D. Pennington & Daza 17436 (MOL) |                  |             |             |             | LN680281    |              |             |
|                  |                                           |                                                        | Kainulainen et al. (2013)          | HM164161         |             |             |             |             |              |             |
|                  | <i>Emmenopterys</i>                       | <i>Emmenopterys henryi</i> Oliv.                       | Kainulainen et al. (2010)          |                  |             | FJ871950    | FJ905347    |             | FJ884645     | FJ948381    |
|                  |                                           |                                                        | Robbrecht s.n. (UPS)               |                  |             |             | LN680353    | LN680312    |              |             |
|                  |                                           |                                                        | Bremer et al. (1999)               | Y18715           | AJ236294    |             |             |             |              |             |
|                  |                                           |                                                        | Kainulainen et al. (2009)          |                  |             |             |             |             |              | FM204719    |
| <i>Pinckneya</i> | <i>Pinckneya bracteata</i> (Bartram) Raf. | Massey s.n. 15F                                        |                                    |                  |             |             | LN680372    | LN680304    |              |             |
|                  |                                           | Bremer et al. (1995)                                   | X83661                             |                  |             |             |             |             |              |             |
|                  |                                           | Bremer et al. (1999)                                   |                                    | AJ130839         |             |             |             |             |              |             |

S1 Table – List of investigated taxa with accession numbers

| Family/Group | Tribe           | Genus                 | Species                                                | Citation/Voucher                | <i>rbcL</i> | <i>ndhF</i> | <i>matK</i> | <i>trnV</i> | <i>rps16</i> | <i>trnL</i> |
|--------------|-----------------|-----------------------|--------------------------------------------------------|---------------------------------|-------------|-------------|-------------|-------------|--------------|-------------|
|              |                 |                       |                                                        | Kainulainen et al. (2010)       |             |             |             |             | FJ884668     | FJ948408    |
|              | Coptosapelteae  | <i>Coptosapelta</i>   | <i>Coptosapelta diffusa</i> (Champ. ex Benth.) Steenis | Bartholomew et al. 847 (AAU)    |             |             | LN680346    | LN680282    |              |             |
|              |                 |                       |                                                        | Rydin et al. (2008)             | EU145453    | EU145403    |             |             | EU145482     | EU145527    |
|              | Cordieryae      | <i>Stachyarrhena</i>  | <i>Stachyarrhena heterochroa</i> Standl.               | Persson et al. 821 (GB)         | LN680384    | LN680392    | LN680378    | LN680309    | LN680874     | LN680877    |
|              | Coussareeae     | <i>Faramea</i>        | <i>Faramea multiflora</i> A.Rich.                      | Bremer 3331 (UPS)               |             |             | LN680354    | LN680313    |              |             |
|              |                 |                       |                                                        | Bremer (1996)                   | Z68796      |             |             |             |              |             |
|              |                 |                       |                                                        | Rydin et al. (2008)             |             | EU145424    |             |             |              |             |
|              |                 |                       |                                                        | Andersson & Rova (1999)         |             |             |             |             | AF004048     |             |
|              |                 |                       |                                                        | Struwe et al. (1998)            |             |             |             |             |              | AF102422    |
|              | Craterispermeae | <i>Craterispermum</i> | <i>Craterispermum longipedunculatum</i> Verdc.         | Luke 9196 (UPS)                 | LN680381    | LN680386    | –           | –           | LN680871     | LN680875    |
|              | Crossopterygeae | <i>Crossopteryx</i>   | <i>Crossopteryx febrifuga</i> (Afzel. ex G.Don) Benth. | Bremer 3097 (UPS)               |             |             | LN680348    | LN680284    |              |             |
|              |                 |                       |                                                        | Bremer & Eriksson (2009)        | AM117223    |             |             |             |              |             |
|              |                 |                       |                                                        | Kainulainen et al. (2009)       |             | AM949851    |             |             | FM204717     | FM207123    |
|              | Danaideae       | <i>Danais</i>         | <i>Danais xanthorrhea</i> (K. Schum.) Bremek.          | Bremer 3079 (UPS)               |             |             | LN680350    | LN680285    |              |             |
|              |                 |                       |                                                        | Bremer (1996)                   | Z68794      |             |             |             |              |             |
|              |                 |                       |                                                        | Bremer et al. (1999)            |             | AJ236293    |             |             |              |             |
|              |                 |                       |                                                        | Bremer & Eriksson (2009)        |             |             |             |             | AM117297     |             |
|              |                 |                       |                                                        | Backlund et al. (2007)          |             |             |             |             |              | DQ662138    |
|              | Dunnieae        | <i>Dunnia</i>         | <i>Dunnia sinensis</i> Tutch.                          | Zhuhai 12, Ge et al. 2002       |             |             | LN680352    | LN680287    |              |             |
|              |                 |                       |                                                        | Rydin et al. (2008)             | EU145467    | EU145444    |             |             | EU145517     | EU145587    |
|              | Foonchewieae    | <i>Foonchewia</i>     | <i>Foonchewia guangdongensis</i> R.J.Wang & H.Z.Wen    | Wen & Wang (2012)               | JQ002642    | JQ002646    | –           | –           | JQ002638     | –           |
|              | Gaertnereae     | <i>Gaertnera</i>      | <i>Gaertnera phyllosepala</i> Baker                    | Kårehed et al. 274 (UPS)        |             | LN680388    | LN680355    | LN680288    |              |             |
|              |                 |                       |                                                        | Razafimandimbison et al. (2008) | AM945288    |             |             |             | AM945311     |             |
|              |                 |                       | <i>Gaertnera</i> sp.                                   | Backlund et al. (2007)          |             |             |             |             |              | DQ662139    |
|              | Gardenieae      | <i>Gardenia</i>       | <i>Gardenia hansemannii</i> K.Schum.                   | Drozd & Molem 1998-11-13        |             |             | LN680356    | LN680289    |              |             |
|              |                 |                       |                                                        | Novotny et al. (2002)           | AJ318446    |             |             |             | AJ320077     |             |

S1 Table – List of investigated taxa with accession numbers

| Family/Group | Tribe          | Genus                | Species                                    | Citation/Voucher                  | <i>rbcL</i> | <i>ndhF</i> | <i>matK</i> | <i>trnV</i> | <i>rps16</i> | <i>trnL</i> |
|--------------|----------------|----------------------|--------------------------------------------|-----------------------------------|-------------|-------------|-------------|-------------|--------------|-------------|
|              |                |                      |                                            | Kainulainen et al. (2009)         |             | AM949852    |             |             |              | FM207126    |
|              | Greeneae       | <i>Greenea</i>       | <i>Greenea oblonga</i> Craib               | Larsen K. & Larsen S.S. 33451 (P) | –           |             |             | LN680320    |              |             |
|              |                |                      |                                            | Kainulainen et al. (2013)         |             | HM164371    | HM119539    |             |              |             |
|              |                |                      |                                            | Mouly et al. (2009)               |             |             |             |             | EU817439     | EU817459    |
|              | Guettardeae    | <i>Guettarda</i>     | <i>Guettarda speciosa</i> L.               | Rova 2492 (GB)                    |             |             | LN680358    | LN680291    |              |             |
|              |                |                      |                                            | Andersson & Antonelli (2005)      | AY538485    |             |             |             |              |             |
|              |                |                      |                                            | Manns & Bremer (2010)             |             | GQ852213    |             |             |              | GQ852509    |
|              |                |                      |                                            | Rova (unpublished)                |             |             |             |             | AF242964     |             |
|              | Hamelieae      | <i>Deppea</i>        | <i>Deppea grandiflora</i> Schltld.         | Bremer 2724 (UPS)                 |             |             | LN680351    | LN680286    |              |             |
|              |                |                      |                                            | Manns & Bremer (2010)             |             | GQ852198    |             |             |              | GQ852493    |
|              |                |                      |                                            | Bremer et al. (1995)              | X83633      |             |             |             |              |             |
|              |                |                      |                                            | Bremer & Eriksson (2009)          |             |             |             |             | AM117299     |             |
|              | Henriquezieae  | <i>Henriquezia</i>   | <i>Henriquezia nitida</i> Spruce ex Benth. | Liesner 8531 (MO)                 | –           |             | LN680360    | LN680322    |              |             |
|              |                |                      |                                            | Kainulainen et al. (2013)         |             | HM164374    |             |             | HM164211     | HM164325    |
|              | Hillieae       | <i>Hillia</i>        | <i>Hillia triflora</i> (Oerst.) C.M.Taylor | Bremer 3101 (UPS)                 |             |             | LN680361    | LN680293    |              |             |
|              |                |                      |                                            | Bremer et al. (1995)              | X83642      |             |             |             |              |             |
|              |                |                      |                                            | Bremer et al. (1999)              |             | AJ236298    |             |             |              |             |
|              |                |                      |                                            | Bremer & Eriksson (2009)          |             |             |             |             | AM117315     |             |
|              |                |                      |                                            | Manns & Bremer (2010)             |             |             |             |             |              | GQ852513    |
|              | Hymenodictyeae | <i>Hymenodictyon</i> | <i>Hymenodictyon floribundum</i> B.L.Rob   | Puff 861109-3/1 (WU)              |             |             |             | LN680294    |              |             |
|              |                |                      |                                            | Razafimandimbison & Bremer (2002) | AJ347015    |             |             |             |              |             |
|              |                |                      |                                            | Rydin et al. (2008)               |             | EU145411    |             |             |              |             |
|              |                |                      |                                            | Andersson & Antonelli (2005)      |             |             | AY538392    |             |              |             |
|              |                |                      |                                            | Andersson & Rova (1999)           |             |             |             |             | AF004058     |             |
|              |                |                      |                                            | Manns & Bremer (2010)             |             |             |             |             |              | GQ852517    |
|              | Insertae sedis | <i>Glionnetia</i>    | <i>Glionnetia sericea</i> (Baker) Tirveng. | Beaver 17 (S)                     |             |             | LN680357    | LN680290    |              |             |
|              |                |                      |                                            | Razafimandimbison et al. (2011)   | HM536223    | HM536217    |             |             | HM536229     | HM536235    |
|              | Isertieae      | <i>Isertia</i>       | <i>Isertia laevis</i> (Triana) B.M.Boom    | Bremer 3364 (UPS)                 |             |             | LN680362    | LN680295    |              |             |

S1 Table – List of investigated taxa with accession numbers

| Family/Group | Tribe               | Genus | Species                                      | Citation/Voucher                | <i>rbcL</i> | <i>ndhF</i> | <i>matK</i> | <i>trnV</i> | <i>rps16</i> | <i>trnL</i> |
|--------------|---------------------|-------|----------------------------------------------|---------------------------------|-------------|-------------|-------------|-------------|--------------|-------------|
|              |                     |       |                                              | Bremer & Thulin (1998)          | Y11852      |             |             |             |              |             |
|              |                     |       |                                              | Manns & Bremer (2010)           |             | GQ852226    |             |             |              | GQ852519    |
|              |                     |       |                                              | Bremer & Eriksson (2009)        |             |             |             |             | AM117319     |             |
| Ixoreae      | <i>Ixora</i>        |       | <i>Ixora coccinea</i> L.                     | Bremer 2719 (UPS)               |             |             | LN680363    | LN680296    |              |             |
|              |                     |       |                                              | Kainulainen et al. (2013)       | HM164167    | HM164376    |             |             |              |             |
|              |                     |       |                                              | Mouly et al. (2007)             |             |             |             |             | EF205641     |             |
|              |                     |       |                                              | Mouly et al. (2009)             |             |             |             |             |              | EU817464    |
| Jackieae     | <i>Jackiopsis</i>   |       | <i>Jackiopsis ornata</i> (Wall.) Ridsdale    | K.S. Tan s.n.                   |             |             | LN680364    | LN680297    |              |             |
|              |                     |       |                                              | Razafimandimbison et al. (2011) | HM536219    | HM536213    |             |             | HM536225     | HM536231    |
| Knoxieae     | <i>Pentas</i>       |       | <i>Pentas lanceolata</i> (Forssk.) Deflers   | Bremer, 2702 (S)                |             |             |             | LN680303    |              |             |
|              |                     |       |                                              | Bremer et al. (1995)            | X83659      |             |             |             |              |             |
|              |                     |       |                                              | Bremer et al. (1999)            |             | AJ236304    |             |             |              |             |
|              |                     |       |                                              | Nakamura et al. (2006)          |             |             | AB247151    |             |              |             |
|              |                     |       |                                              | Kårehed & Bremer (2007)         |             |             |             |             | AM266875     | AM266963    |
| Lasiantheae  | <i>Lasianthus</i>   |       | <i>Lasianthus kilimandscharicus</i> K.Schum. | Lantz 119 (UPS)                 |             |             | LN680365    | LN680314    |              |             |
|              |                     |       |                                              | Bremer & Eriksson (2009)        | AM117237    |             |             |             | AM117327     |             |
|              |                     |       |                                              | Rydin et al. (2008)             |             | EU145426    |             |             |              |             |
|              |                     |       |                                              | Backlund et al. (2007)          |             |             |             |             |              | DQ662147    |
| Luculieae    | <i>Luculia</i>      |       | <i>Luculia grandifolia</i> Ghose             | Bremer et al. (1995)            | X83648      |             | –           |             |              |             |
|              |                     |       | <i>Luculia gratissima</i> Sweet              | Bremer et al. (2002)            |             |             | –           | AJ429678    | AJ431036     | AJ430911    |
|              |                     |       |                                              | Oxelman et al. (1999)           |             | AJ011987    |             |             |              |             |
| Mitchelleae  | <i>Mitchella</i>    |       | <i>Mitchella repens</i> L.                   | Bremer 2714 (S)                 |             |             | LN680366    | LN680298    |              |             |
|              |                     |       |                                              | Bremer (1996)                   | Z68805      |             |             |             |              |             |
|              |                     |       |                                              | Razafimandimbison et al. (2008) |             | AM945258    |             |             |              |             |
|              |                     |       |                                              | Andersson & Rova (1999)         |             |             |             |             | AF001441     |             |
|              |                     |       |                                              | Razafimandimbison et al. (2009) |             |             |             |             |              | FJ906973    |
|              | <i>Mitriostigma</i> |       | <i>Mitriostigma axillare</i> Hochst.         | Bremer 2705 (UPS)               |             |             |             | LN680299    |              |             |
|              |                     |       |                                              | Bremer et al. (1995)            | X83650      |             |             |             |              |             |
|              |                     |       |                                              | Kainulainen et al. (2013)       |             | HM164381    | HM119550    |             | HM164216     | HM164329    |

S1 Table – List of investigated taxa with accession numbers

| Family/Group  | Tribe               | Genus               | Species                                                         | Citation/Voucher              | <i>rbcL</i> | <i>ndhF</i> | <i>matK</i> | <i>trnV</i> | <i>rps16</i> | <i>trnL</i> |
|---------------|---------------------|---------------------|-----------------------------------------------------------------|-------------------------------|-------------|-------------|-------------|-------------|--------------|-------------|
| Morindeae     | <i>Morinda</i>      | <i>Morinda</i>      | <i>Morinda citrifolia</i> L.                                    | Bremer 3302 (UPS)             |             |             | LN680367    | LN680300    |              | AF152616    |
|               |                     |                     |                                                                 | Novotny et al. (2002)         | AJ318448    |             |             |             |              |             |
|               |                     |                     |                                                                 | Bremer et al. (1999)          |             | AJ236300    |             |             |              |             |
|               |                     |                     |                                                                 | Vicentini & Stevens (unpubl.) |             |             |             |             | EU872844     |             |
| Mussaendeae   | <i>Mussaenda</i>    | <i>Mussaenda</i>    | <i>Mussaenda arcuata</i> Poir.                                  | McPehrson 16213 (MO)          |             |             |             | LN680301    |              |             |
|               |                     |                     |                                                                 | Bremer & Thulin (1998)        | Y11854      |             |             |             |              |             |
|               |                     |                     |                                                                 | Bremer et al. (1999)          |             | AJ236301    |             |             |              |             |
|               |                     |                     |                                                                 | Kainulainen et al. (2013)     |             |             | HM119551    |             |              |             |
|               |                     |                     |                                                                 | Kainulainen et al. (2009)     |             |             |             |             | FM204721     | FM207128    |
| Naucleaeae    | <i>Cephalanthus</i> | <i>Cephalanthus</i> | <i>Cephalanthus occidentalis</i> L.                             | Forbes s.n. (S)               |             |             |             | LN680279    |              |             |
|               |                     |                     |                                                                 | Bremer et al. (1995)          | X83629      |             |             |             |              |             |
|               |                     |                     |                                                                 | Bremer et al. (1999)          |             | AJ236288    |             |             |              |             |
|               |                     |                     |                                                                 | Andersson & Antonelli (2005)  |             |             | AY538377    |             |              |             |
|               |                     |                     |                                                                 | Andersson & Rova (1999)       |             |             |             |             | AF004033     |             |
| Octotropideae | <i>Paragenipa</i>   | <i>Paragenipa</i>   | <i>Paragenipa lancifolia</i> (Bojer ex Baker) Tirveng. & Robbr. | Rova et al. (2002)            |             |             |             |             |              | AF152692    |
|               |                     |                     |                                                                 | Persson 156 (GB)              |             |             | LN680370    | LN680302    |              |             |
|               |                     |                     |                                                                 | Andreasen & Bremer (2000)     | AJ286707    |             |             |             |              |             |
|               |                     |                     |                                                                 | Kainulainen et al. (2013)     |             | HM164385    |             |             |              |             |
|               |                     |                     |                                                                 | Andersson & Rova (1999)       |             |             |             |             | AF004066     |             |
| Ophiorrhizeae | <i>Ophiorrhiza</i>  | <i>Ophiorrhiza</i>  | <i>Ophiorrhiza mungos</i> L.                                    | Rova et al. (2002)            |             |             |             |             |              | HM164330    |
|               |                     |                     |                                                                 | Bremer 3301 (UPS)             |             |             | LN680368    | LN680315    |              | AF152672    |
|               |                     |                     |                                                                 | Bremer et al. (1995)          | X83656      |             |             |             |              |             |
|               |                     |                     |                                                                 | Bremer et al. (1999)          |             | AJ130838    |             |             |              |             |
|               |                     |                     |                                                                 | Andersson & Rova (1999)       |             |             |             |             | AF004064     |             |
| Paederieae    | <i>Paederia</i>     | <i>Paederia</i>     | <i>Paederia foetida</i> L.                                      | Backlund et al. (2007)        |             |             |             |             |              | DQ662151    |
|               |                     |                     |                                                                 | Wong & Keong s.n. (KLU)       |             |             | LN680369    | LN680323    |              |             |
|               |                     |                     |                                                                 | Andersson (unpublished)       | AF332373    |             |             |             |              |             |
|               |                     |                     |                                                                 | Andersson & Rova (1999)       |             |             |             |             | AF004065     |             |

S1 Table – List of investigated taxa with accession numbers

| Family/Group | Tribe            | Genus                | Species                                                    | Citation/Voucher                | <i>rbcL</i> | <i>ndhF</i> | <i>matK</i> | <i>trnV</i>          | <i>rps16</i> | <i>trnL</i> |
|--------------|------------------|----------------------|------------------------------------------------------------|---------------------------------|-------------|-------------|-------------|----------------------|--------------|-------------|
|              |                  |                      |                                                            | Rova et al. (2002)              |             |             |             |                      |              | AF152619    |
|              |                  |                      | <i>Paederia bojeriana</i> (A.Rich. ex DC.)                 | Rydin et al. (2009)             |             | FJ695318    |             |                      |              |             |
|              | Palicoureae      | <i>Palicourea</i>    | <i>Palicourea crocea</i> (Sw.) Schult.                     | Bremer & Eriksson (2009)        | AM117253    |             | –           | –                    |              |             |
|              |                  |                      |                                                            | Razafimandimbison et al. (2008) |             | AM945280    |             |                      |              |             |
|              |                  |                      |                                                            | Andersson & Taylor (unpubl.)    |             |             |             |                      | AF147510     |             |
|              |                  |                      | <i>Palicourea guianensis</i> Aubl.                         | Rova et al. (2002)              |             |             | –           | –                    |              | AF152615    |
|              | Pavetteae        | <i>Pavetta</i>       | <i>Pavetta abyssinica</i> Fresen.                          | De Block 6 (BR)                 |             |             | LN680371    | LN680324<br>LN680333 |              |             |
|              |                  |                      |                                                            | Andreasen & Bremer (1996)       | Z68863      |             |             |                      |              |             |
|              |                  |                      |                                                            | Kainulainen et al. (2009)       |             | AM949854    |             |                      | FM204726     | FM207133    |
|              | Posoquerieae     | <i>Posoqueria</i>    | <i>Posoqueria latifolia</i> (Rudge) Roem. & Schult.        | SU-C-88.10 Trädg.herb. KA       |             |             |             | LN680325             |              |             |
|              |                  |                      |                                                            | Andreasen & Bremer (1996)       | Z68850      |             |             |                      |              |             |
|              |                  |                      |                                                            | Kainulainen et al. (2009)       |             | AM949855    |             |                      | FM204728     | FM207135    |
|              |                  |                      |                                                            | Kainulainen et al. (2010)       |             |             | FJ905325    |                      |              |             |
|              | Prismatomerideae | <i>Prismatomeris</i> | <i>Prismatomeris albidiflora</i> Thwaites                  | Martin Marie 89 (P)             | LN680382    | LN680390    | –           | –                    | LN680872     | –           |
|              | Psychotrieae     | <i>Cremocarpon</i>   | <i>Cremocarpon lantzii</i> Bremek.                         | Razafimandimbison 517 (UPS)     |             | LN680387    | LN680347    | LN680283             |              |             |
|              |                  |                      |                                                            | Bremer & Eriksson (2009)        | AM117222    |             |             |                      | AM117296     | AM117356    |
|              |                  | <i>Psychotria</i>    | <i>Psychotria holtzii</i> (K.Schum.) E.M.A.Petit           | Q. Luke 8342 (UPS)              | LN680383    | LN680391    | –           | –                    | LN680873     | LN680876    |
|              | Putorieae        | <i>Plocama</i>       | <i>Plocama pendula</i> Aiton                               | Bremer (1996)                   | Z68816      |             | –           | –                    |              |             |
|              |                  |                      |                                                            | Rydin et al. (2009)             |             | FJ695329    |             |                      | FJ695276     |             |
|              |                  |                      |                                                            | Backlund et al. (2007)          |             |             |             |                      |              | DQ662162    |
|              | Retiniphyllaeae  | <i>Retiniphyllum</i> | <i>Retiniphyllum pilosum</i> (Spruce ex Benth.) Müll. Arg. | Andersson (unpublished)         | AF331654    |             | –           | –                    |              |             |
|              |                  |                      |                                                            | Kainulainen et al. (2013)       |             | HM164392    |             |                      |              |             |
|              |                  |                      |                                                            | Andersson & Rova (1999)         |             |             |             |                      | AF004076     |             |
|              |                  |                      |                                                            | Kainulainen et al. (2009)       |             |             |             |                      |              | FM207137    |
|              | Rondeletieae     | <i>Rondeletia</i>    | <i>Rondeletia odorata</i> Jacq.                            | Bremer & Andreasen 3504 (UPS)   |             |             | LN680374    | LN680305             |              |             |
|              |                  |                      |                                                            | Bremer & Thulin (1998)          | Y11857      |             |             |                      |              |             |

S1 Table – List of investigated taxa with accession numbers

| Family/Group | Tribe         | Genus               | Species                                               | Citation/Voucher                | <i>rbcL</i> | <i>ndhF</i> | <i>matK</i> | <i>trnV</i> | <i>rps16</i> | <i>trnL</i> |
|--------------|---------------|---------------------|-------------------------------------------------------|---------------------------------|-------------|-------------|-------------|-------------|--------------|-------------|
|              |               |                     |                                                       | Backlund et al. (2000)          |             | AJ235845    |             |             |              |             |
|              |               |                     |                                                       | Rydin et al. (2008)             |             |             |             |             | EU145490     |             |
|              |               |                     |                                                       | Rova et al. (2002)              |             |             |             |             |              | AF152741    |
|              | Rubieae       | <i>Rubia</i>        | <i>Rubia tinctorum</i> L.                             | Bremer 3300 (UPS)               |             |             | LN680375    | LN680326    |              |             |
|              |               |                     |                                                       | Bremer et al. (1995)            | X83666      |             |             |             |              |             |
|              |               |                     |                                                       | Manen (unpublished)             |             | DQ359167    |             |             |              |             |
|              |               |                     |                                                       | Rydin et al. (2009)             |             |             |             |             |              | FJ695421    |
|              |               |                     | <i>Rubia fruticosa</i> Aiton                          | Andersson & Rova (1999)         |             |             |             |             | AF004078     |             |
|              | Sabiceae      | <i>Hekistocarpa</i> | <i>Hekistocarpa minutiflora</i> Hook.f.               | Dessein s.n. (P)                |             |             |             | LN680292    |              |             |
|              |               |                     |                                                       | Dessein et al. (2001)           | AF332366    |             |             |             | AF332367     |             |
|              |               |                     |                                                       | Kainulainen et al. (2013)       |             | HM164373    | HM119541    |             |              | HM164324    |
|              |               | <i>Sabicea</i>      | <i>Sabicea diversifolia</i> Pers.                     | Bremer et al. 4018-B18 (UPS)    |             |             |             | LN680306    |              |             |
|              |               |                     |                                                       | Rydin et al. (2008)             | EU145459    | EU145415    |             |             | EU145494     |             |
|              |               |                     |                                                       | Kainulainen et al. (2013)       |             |             | HM119568    |             |              |             |
|              |               |                     |                                                       | Alejandro et al. (2005)         |             |             |             |             |              | AJ847396    |
|              | Schizocoleae  | <i>Schizocolea</i>  | <i>Schizocolea linderi</i> (Hutch. & Dalziel) Bremek. | Adam 789 (P)                    |             |             | LN680376    |             |              |             |
|              |               |                     |                                                       | Adam 20116 (UPS)                |             |             |             | LN680307    |              |             |
|              |               |                     |                                                       | Bremer & Eriksson (2009)        | AM117272    |             |             |             |              |             |
|              |               |                     |                                                       | Rydin et al. (2009)             |             | FJ695334    |             |             |              |             |
|              |               |                     |                                                       | Rydin et al. (2008)             |             |             |             |             | EU145498     | EU145546    |
|              | Schradereae   | <i>Schradera</i>    | <i>Schradera subandina</i> K.Krause                   | Clark & Watt 783 (QCNE)         |             |             | LN680377    | LN680308    |              |             |
|              |               |                     |                                                       | Bremer & Thulin (1998)          | Y11859      |             |             |             |              |             |
|              |               |                     |                                                       | Razafimandimbison et al. (2008) |             | AM945264    |             |             | AM945313     |             |
|              |               |                     | <i>Schradera</i> sp.                                  | Rova et al. (2002)              |             |             |             |             |              | AF152613    |
|              | Scyphiphoreae | <i>Scyphiphora</i>  | <i>Scyphiphora hydrophyllacea</i> C.F.Gaertn.         | K Bremer <i>et al.</i> 99 (S)   |             |             |             | LN680317    |              |             |
|              |               |                     |                                                       | Bremer et al. (1999)            | Y18717      | AJ236311    |             |             |              |             |
|              |               |                     |                                                       | Kainulainen et al. (2010)       |             |             | FJ905327    |             |              |             |

S1 Table – List of investigated taxa with accession numbers

| Family/Group | Tribe           | Genus                | Species                                          | Citation/Voucher          | <i>rbcL</i> | <i>ndhF</i> | <i>matK</i> | <i>trnV</i>          | <i>rps16</i> | <i>trnL</i> |
|--------------|-----------------|----------------------|--------------------------------------------------|---------------------------|-------------|-------------|-------------|----------------------|--------------|-------------|
|              |                 |                      |                                                  | Mouly et al. (2009)       |             |             |             |                      | EU817450     | EU817475    |
|              | Sipaneeae       | <i>Dendrosipanea</i> | <i>Dendrosipanea spigelioides</i> Ducke          | Prance et al. 16199 (S)   |             |             |             | LN680310             |              |             |
|              |                 |                      |                                                  | Kainulainen et al. (2013) | HM164162    |             |             |                      |              |             |
|              |                 |                      |                                                  | Kainulainen et al. (2010) |             | FJ871943    | FJ905324    |                      | FJ884627     | FJ948360    |
|              | Spermacoaceae   | <i>Hedyotis</i>      | <i>Hedyotis fruticosa</i> L.                     | Larsson & Pyddoke 22 (S)  |             | LN680389    | LN680359    | LN680321<br>LN680332 |              |             |
|              |                 |                      |                                                  | Bremer (1996)             | Z68799      |             |             |                      |              |             |
|              |                 |                      |                                                  | Groeninckx et al. (2009)  |             |             |             |                      |              | EU543098    |
|              |                 |                      | <i>Hedyotis macrostegia</i> Stapf                | Andersson & Rova (1999)   |             |             |             |                      | AF002767     |             |
|              |                 | <i>Kohautia</i>      | <i>Kohautia caespitosa</i> Schnizl.              | Bremer (1996)             | Z68800      |             | –           | –                    |              |             |
|              |                 |                      |                                                  | Rydin et al. (2009)       |             | FJ695303    |             |                      |              |             |
|              |                 |                      |                                                  | Bremer & Eriksson (2009)  |             |             |             |                      | AM117324     |             |
|              |                 |                      |                                                  | Rydin et al. (2008)       |             |             |             |                      |              | EU145573    |
|              | Steenisieae     | <i>Steenisia</i>     | <i>Steenisia pleurocarpa</i> (Airy Shaw) Bakh.f. | Puff BF 990619-1/4 (WU)   |             |             |             | LN680327             |              |             |
|              |                 |                      |                                                  | Bremer & Eriksson (2009)  | AM117279    |             |             |                      |              |             |
|              |                 |                      |                                                  | Kainulainen et al. (2013) |             | HM164396    |             |                      |              |             |
|              |                 |                      |                                                  | Kainulainen et al. (2010) |             |             | FJ905328    |                      |              |             |
|              |                 |                      |                                                  | Kainulainen et al. (2009) |             |             |             |                      | FM204735     | FM207142    |
|              | Theligoneae     | <i>Theligonum</i>    | <i>Theligonum cynocrambe</i> L.                  | Thor 654 (S)              |             |             | LN680379    | LN680328<br>LN680334 |              |             |
|              |                 |                      |                                                  | Bremer et al. (1995)      | X83668      |             |             |                      |              |             |
|              |                 |                      |                                                  | Rydin et al. (2009)       |             | FJ695339    |             |                      |              | FJ695427    |
|              |                 |                      |                                                  | Andersson & Rova (1999)   |             |             |             |                      | AF004087     |             |
|              | Trailliaedoxeae | <i>Trailliaedoxa</i> | <i>Trailliaedoxa gracilis</i> W.W.Sm. & Forrest  | Boufford & al 35041 (MO)  |             |             | LN680380    | LN680329<br>LN680335 |              |             |
|              |                 |                      |                                                  | Kainulainen et al. (2013) | HM164183    | HM164400    |             |                      | HM164227     | HM164339    |
|              | Urophyllaeae    | <i>Amphidasya</i>    | <i>Amphidasya ambigua</i> (Standl.) Standl.      | Clark & Watt 736 (UPS)    |             | LN680385    | LN680338    | LN680274             |              |             |
|              |                 |                      |                                                  | Bremer & Thulin (1998)    | Y11844      |             |             |                      |              |             |
|              |                 |                      |                                                  | Piesschaert et al. (2000) |             |             |             |                      | AF129271     |             |
|              |                 |                      |                                                  | Rydin et al. (2008)       |             |             |             |                      |              | EU145576    |

S1 Table – List of investigated taxa with accession numbers

| Family/Group     | Tribe       | Genus               | Species                                                    | Citation/Voucher              | <i>rbcL</i> | <i>ndhF</i> | <i>matK</i> | <i>trnV</i> | <i>rps16</i> | <i>trnL</i> |
|------------------|-------------|---------------------|------------------------------------------------------------|-------------------------------|-------------|-------------|-------------|-------------|--------------|-------------|
|                  | Vanguerieae | <i>Psydrax</i>      | <i>Psydrax obovata</i> (Klotzsch ex Eckl. & Zeyh.) Bridson | Bremer & Bremer 3762 (UPS)    |             |             | LN680373    | LN680316    |              |             |
|                  |             |                     |                                                            | Kainulainen et al. (2013)     | HM164176    | HM164388    |             |             | HM164220     |             |
|                  |             |                     |                                                            | Lantz & Bremer (2004)         |             |             |             |             |              | AJ620161    |
| Sapotaceae       |             | <i>Manilkara</i>    | <i>Manilkara zapota</i> (L.) van Royen                     | Bremer et al. (2002)          |             |             | AJ429295    | AJ429652    | AJ431007     | AJ430885    |
|                  |             |                     |                                                            | Albert et al. (1992)          | L01932      |             |             |             |              |             |
|                  |             |                     |                                                            | Källersjö et al. (2000)       |             | AF213732    |             |             |              |             |
| Schlegeliaceae   |             | <i>Schlegelia</i>   | <i>Schlegelia parviflora</i> (Oerst.) Monach.              | Bremer et al. (2002)          |             |             | AJ429345    | AJ429696    | AJ431057     | AJ430932    |
|                  |             |                     |                                                            | Olmstead & Reeves (1995)      | L36448      | L36410      |             |             |              |             |
| Scrophulariaceae |             | <i>Androya</i>      | <i>Androya decaryi</i> H. Perrier                          | Oxelmann et al. (unpublished) | AJ001756    | AF027276    |             |             |              |             |
|                  |             |                     |                                                            | Bremer et al. (2002)          |             |             | AJ429329    | AJ429530    | AJ431040     | AJ430915    |
|                  |             | <i>Buddleja</i>     | <i>Buddleja asiatica</i> Lour.                             | Bremer et al. (2002)          |             |             | AJ429346    | AJ429697    | AJ431058     | AJ430933    |
|                  |             |                     | <i>Buddleja davidii</i> Franch.                            | Oxelmann et al. (1999)        | AJ001757    |             |             |             |              |             |
|                  |             |                     |                                                            | Olmstead & Reeves (1995)      |             | L36394      |             |             |              |             |
|                  |             | <i>Myoporum</i>     | <i>Myoporum mauritianum</i> A.DC.                          | Olmstead & Reeves (1995)      | L36445      | L36403      |             |             |              |             |
|                  |             |                     | <i>Myoporum montanum</i> R.Br.                             | Bremer et al. (2002)          |             |             | AJ429347    | AJ429698    | AJ431059     | AJ430934    |
|                  |             | <i>Selago</i>       | <i>Selago thomsoni</i> Rolfe ex Oliver                     | Bremer et al. (2002)          |             |             | AJ429348    | AJ429699    | AJ431060     | AJ430935    |
|                  |             |                     | <i>Selago thunbergii</i> Choisy                            | Olmstead & Reeves (1995)      | L36450      | L36412      |             |             |              |             |
|                  |             | <i>Scrophularia</i> | <i>Scrophularia arguta</i> Sol. ex Ait.                    | Bremer et al. (2002)          |             |             | AJ429349    | AJ429531    | AJ431061     | AJ430936    |
|                  |             |                     | <i>Scrophularia</i> sp.                                    | Olmstead & Reeves (1995)      | L36449      | L36411      |             |             |              |             |
| Solanaceae       |             | <i>Nicotiana</i>    | <i>Nicotiana tabacum</i> L.                                | Shinozaki et al. (1986)       | Z00044      |             | Z00044      | Z00044      | Z00044       | Z00044      |
|                  |             |                     |                                                            | Olmstead et al. (1993)        |             | L14953      |             |             |              |             |
| Sphenocleaceae   |             | <i>Sphenoclea</i>   | <i>Sphenoclea zeylanica</i> Gaertn.                        | Bremer et al. (2002)          |             | AJ429119    | AJ429360    | AJ429534    | AJ431069     | AJ430947    |
|                  |             |                     |                                                            | Cosner et al. (1994)          | L18798      |             |             |             |              |             |
| Stilbaceae       |             | <i>Stilbe</i>       | <i>Stilbe albiflora</i> E. Mey.                            | Oxelmann et al. (1999)        |             | AF027287    |             |             |              |             |
|                  |             |                     | <i>Stilbe ericoides</i> L.                                 | Bremer et al. (2002)          |             |             | AJ429350    | AJ429532    | AJ431062     | AJ430937    |
|                  |             |                     | <i>Stilbe vestita</i> Berg.                                | Bremer (1996)                 | Z68827      |             |             |             |              |             |
| Stylidiaceae     |             | <i>Stylidium</i>    | <i>Stylidium bulbiferum</i> Benth.                         | Bremer et al. (2002)          |             |             | AJ429390    | AJ429735    | AJ431102     | AJ430978    |
|                  |             |                     | <i>Stylidium calcaratum</i> R. Br.                         | Laurent et al. (1998)         | AJ225053    | AJ225079    |             |             |              |             |
| Styracaceae      |             | <i>Halesia</i>      | <i>Halesia carolina</i> L.                                 | Bremer et al. (2002)          |             |             | AJ429298    | AJ429655    | AJ431010     | AJ430082    |

S1 Table – List of investigated taxa with accession numbers

| Family/Group      | Tribe | Genus               | Species                                           | Citation/Voucher            | <i>rbcL</i> | <i>ndhF</i> | <i>matK</i> | <i>trnV</i> | <i>rps16</i> | <i>trnL</i> |
|-------------------|-------|---------------------|---------------------------------------------------|-----------------------------|-------------|-------------|-------------|-------------|--------------|-------------|
|                   |       |                     |                                                   | Morton et al. (1997)        | Z80190      |             |             |             |              |             |
|                   |       |                     | <i>Halesia tetraptera</i> L.                      | Olmstead et al. (2000)      |             | AF130214    |             |             |              |             |
|                   |       | <i>Styrax</i>       | <i>Styrax americanum</i> Lam.                     | Kron & Chase (1983)         | L12623      |             |             |             |              |             |
|                   |       |                     |                                                   | Olmstead et al. (2000)      |             | AF130215    |             |             |              |             |
|                   |       |                     | <i>Styrax officinale</i> L.                       | Bremer et al. (2002)        |             |             | AJ429300    | AJ429657    | AJ431011     | AJ430888    |
| Symplocaceae      |       | <i>Symplocos</i>    | <i>Symplocos bogotensis</i> Brand                 | Bremer et al. (2002)        |             |             | AJ429301    | AJ429658    | AJ431012     | AJ430889    |
|                   |       |                     |                                                   | Anderberg et al. (2002)     |             | AF421074    |             |             |              |             |
|                   |       |                     | <i>Symplocos costata</i> Choisy ex Zoll.          | Morton et al. (1997)        | Z80192      |             |             |             |              |             |
| Ternstroemiaceae  |       | <i>Ternstroemia</i> | <i>Ternstroemia gymnanthera</i> Sprague           | Bremer et al. (2002)        |             |             | AJ429302    | AJ429659    | AJ431013     | AJ430890    |
|                   |       |                     |                                                   | Anderberg et al. (2002)     |             | AF421076    |             |             |              |             |
|                   |       |                     | <i>Ternstroemia stahlii</i> Krug and Urb.         | Morton et al. (1997)        | Z80211      |             |             |             |              |             |
| (Pentaphyllaceae) |       | <i>Pentaphylax</i>  | <i>Pentaphylax euryoides</i> Gardn. and Champ.    | Bremer et al. (2002)        | AJ428891    | AJ429106    | AJ429291    | AJ429648    | AJ431003     | AJ430881    |
| (Sladeniaceae)    |       | <i>Sladenia</i>     | <i>Sladenia celastrifolia</i> Kurz                |                             |             |             | AJ429297    | AJ429654    | AJ431009     | AJ430081    |
|                   |       |                     |                                                   | Savolainen et al. (2000a,b) | AJ403004    |             |             |             |              |             |
|                   |       |                     |                                                   | Anderberg et al. (2002)     |             | AF421081    |             |             |              |             |
| Tetrachondraceae  |       | <i>Polypremum</i>   | <i>Polypremum procumbens</i> L.                   | Bremer et al. (2002)        |             |             | AJ429351    | AJ429700    | AJ431063     | AJ430938    |
|                   |       |                     |                                                   | Oxelmann et al. (1999)      | AJ011989    | AJ011986    |             |             |              |             |
|                   |       | <i>Tetrachondra</i> | <i>Tetrachondra hamiltonii</i> Petrie             | Wagstaff & Olmstead (1997)  | U28885      |             |             |             |              |             |
|                   |       |                     | <i>Tetrachondra patagonica</i> Skottsbo.          | Oxelmann et al. (1999)      |             | AF027272    |             |             |              |             |
|                   |       |                     |                                                   | Bremer et al. (2002)        |             |             | AJ429352    | AJ430389    | AJ431064     | AJ430939    |
| Tetrameristaceae  |       | <i>Pelliciera</i>   | <i>Pelliciera rhizophoreae</i> Planch. and Triana | Bremer et al. (2002)        | AJ428893    |             | AJ429303    | AJ429660    | AJ431014     | AJ430891    |
|                   |       |                     |                                                   | Anderberg et al. (2002)     |             | AF421069    |             |             |              |             |
|                   |       | <i>Tetramerista</i> | <i>Tetramerista</i> sp.                           | Bremer et al. (2002)        |             | AJ429108    | AJ429304    | AJ429528    | AJ431015     | AJ430892    |
|                   |       |                     |                                                   | Morton et al. (1997)        | Z80199      |             |             |             |              |             |
| Theaceae          |       | <i>Camellia</i>     | <i>Camellia japonica</i> L.                       | Kron & Chase (1983)         | L12602      |             |             |             |              |             |
|                   |       |                     |                                                   | Olmstead et al. (2000)      |             | AF130216    |             |             |              |             |
|                   |       |                     | <i>Camellia sinensis</i> Kuntze                   | Bremer et al. (2002)        |             |             | AJ429305    | AJ429661    | AJ431016     | AJ430893    |
|                   |       | <i>Schima</i>       | <i>Schima superba</i> Gardn. and Champ.           | Morton et al. (1997)        | Z80208      |             |             |             |              |             |

S1 Table – List of investigated taxa with accession numbers

| Family/Group                       | Tribe | Genus               | Species                                       | Citation/Voucher                | <i>rbcL</i>              | <i>ndhF</i> | <i>matK</i> | <i>trnV</i> | <i>rps16</i> | <i>trnL</i> |
|------------------------------------|-------|---------------------|-----------------------------------------------|---------------------------------|--------------------------|-------------|-------------|-------------|--------------|-------------|
| Theophrastaceae                    |       | <i>Theophrasta</i>  | <i>Theophrasta americana</i> L.               | Anderberg et al. (2002)         |                          | AF421073    |             |             |              |             |
|                                    |       |                     |                                               | Bremer et al. (2002)            |                          |             | AJ429306    | AJ429662    | AJ431017     | AJ430894    |
|                                    |       |                     |                                               | Anderberg et al. (1998)         | U96649                   |             |             |             |              |             |
|                                    |       |                     |                                               | Källersjö et al. (2000)         |                          | AF213762    |             |             |              |             |
|                                    |       |                     |                                               | Bremer et al. (2002)            |                          |             | AJ429307    | AJ429663    | AJ431018     | AJ430895    |
| Toricellia group<br>(Aralidiaceae) |       | <i>Aralidium</i>    | <i>Aralidium pinnatifidum</i> Miq.            | Bremer et al. (2002)            |                          | AJ429126    |             | AJ429718    | AJ431083     | AJ430083    |
| (Melanophyllaceae)                 |       | <i>Melanophylla</i> | <i>Melanophylla alnifolia</i> Baker           | Xiang & Soltis (unpublished)    | AF299087                 |             |             |             |              |             |
|                                    |       |                     |                                               | Plunkett et al. (1997)          |                          |             | U58627      |             |              |             |
|                                    |       |                     |                                               | Plunkett et al. (1996)          | U50254                   |             |             |             |              |             |
| (Torricelliaceae)                  |       | <i>Toricellia</i>   | <i>Toricellia tiliaefolia</i> DC.             | Albach et al. (2001a,b)         |                          | AJ236244    |             |             |              |             |
|                                    |       |                     |                                               | Bremer et al. (2002)            |                          |             | AJ429373    | AJ430390    | AJ431085     | AJ430959    |
| Tribelaceae                        |       | <i>Tribeles</i>     | <i>Tribeles australis</i> Phil.               | Xiang & Soltis (unpublished)    | AF299089                 |             |             |             |              |             |
|                                    |       |                     |                                               | Bremer et al. (2002)            |                          | AJ429127    | AJ429375    | AJ429721    | AJ431087     | AJ430961    |
| Vahliaceae                         |       | <i>Vahlia</i>       | <i>Vahlia capensis</i> Thunb.                 | Savolainen et al. (2000a,b)     | AJ403010                 |             |             |             |              |             |
|                                    |       |                     |                                               | Bremer et al. (2002)            |                          | AJ429123    | AJ429369    | AJ429715    | AJ431080     | AJ430955    |
| Valerianaceae                      |       | <i>Valeriana</i>    | <i>Valeriana fauriei</i> Briquet              | Morgan & Soltis (1993)          | L11208                   |             |             |             |              |             |
|                                    |       |                     |                                               | Bremer et al. (2002)            |                          | AJ429112    | AJ429316    | AJ429671    | AJ431027     | AJ430904    |
|                                    |       |                     |                                               | Olmstead et al. (2000)          |                          | AF130192    |             |             |              |             |
|                                    |       |                     |                                               | <i>Valeriana hirtella</i> Kunth | Backlund & Bremer (1997) | Y10699      |             |             |              |             |
| Verbenaceae                        |       | <i>Verbena</i>      | <i>Verbena officinalis</i> L.                 | Bremer et al. (2002)            |                          |             | AJ429396    | AJ429742    | AJ431109     |             |
|                                    |       |                     |                                               | Bremer et al. (2002)            |                          |             |             |             |              | AJ431680    |
|                                    |       |                     |                                               | Olmstead & Reeves (1995)        |                          |             | L36418      |             |              |             |
| Vitaceae                           |       | <i>Vitis</i>        | <i>Vitis bracteata</i> Cav. ex Lag. and Rodr. | Kaufmann & Wink (1996)          | Z37473                   |             |             |             |              |             |
|                                    |       |                     |                                               | Bremer et al. (2002)            |                          |             | AJ429353    | AJ429701    | AJ431065     | AJ430940    |
|                                    |       |                     |                                               | Albert et al. (1992)            | L01960                   |             |             |             |              |             |
|                                    |       |                     | <i>Vitis vinifera</i> L.                      | Bremer et al. (2002)            |                          | AJ429103    | AJ429274    | AJ429635    | AJ430987     | AJ430864    |

## S1 Table – List of investigated taxa with accession numbers

### References

- Albach DC, Soltis DE, Chase MW, Soltis PS (2001a) Phylogenetic placement of the enigmatic angiosperm *Hydrostachys*. *Taxon* 50: 763–805.
- Albach DC, Soltis PS, Soltis DE (2001b) Phylogenetic analysis of asterids based on sequences of four genes. *Ann Mo Bot Gard* 88: 163–212.
- Albert VA, Williams SE, Chase MW (1992) Carnivorous plants phylogeny and structural evolution *Science*. 257: 1491–1495.
- Alejandro GD, Razafimandimbison SG, Liede-Schumann S (2005) Polyphyly of *Mussaenda* inferred from ITS and *trnT-F* data and its implication for generic limits in Mussaendeae (Rubiaceae). *Am J Bot* 92: 544–557.
- Anderberg AA, Rydin C, Källersjö M (2002) Phylogenetic relationships in the order Ericales s.l.: analyses of molecular data from five genes from the plastid and mitochondrial genomes. *Am J Bot* 89: 677–687.
- Anderberg AA, Ståhl B, Källersjö M (1998) Phylogenetic relationships in the Primulales inferred from cpDNA *rbcL* sequence data. *Plant Syst Evol* 211: 93–102.
- Andersson L, Antonelli A (2005) Phylogeny of the tribe Cinchoneae (Rubiaceae), its position in Cinchonoideae, and description of a new genus, *Ciliosemina*. *Taxon* 54: 17–28.
- Andersson L, Rova JHE (1999) The *rps16* intron and the phylogeny of the Rubioideae (Rubiaceae). *Plant Syst Evol* 214: 161–186.
- Andreasen K, Baldwin B, Bremer B (1999) Phylogenetic utility of the nuclear rDNA ITS region in subfamily Ixoroideae (Rubiaceae): comparisons with cpDNA *rbcL* sequence data. *Plant Syst Evol* 217: 119–135.
- Andreasen K, Bremer B (1996) Phylogeny of the subfamily Ixoroideae (Rubiaceae). *Opera Bot Belg* 7: 119–138.
- Andreasen K, Bremer B (2000) Combined phylogenetic analysis in the Rubiaceae-Ixoroideae: morphology, nuclear and chloroplast DNA data. *Am J Bot* 87: 1731–1748.
- Backlund M, Bremer B (1997) Phylogeny of the Asteridae s. str. based on *rbcL* sequences, with particular reference to the Dipsacales. *Plant Syst Evol* 207: 225–254.
- Backlund M, Bremer B, Thulin M (2007) Paraphyly of Paederieae, recognition of Putorieae and expansion of *Plocama* (Rubiaceae–Rubioideae). *Taxon* 56: 315–328.
- Backlund, M., Oxelman, B., and Bremer, B. (2000). Phylogenetic relationships within the Gentianales based on *ndhF* and *rbcL* sequences, with particular reference to the Loganiaceae (Rubiaceae – Rubioideae). *Am. J. Bot.* 87: 1029–1043.
- Bremer, B (1996) Phylogenetic studies within Rubiaceae and relationships to other families based on molecular data. *Opera Bot Belg* 7: 33–50.
- Bremer B, Andreasen K, Olsson D (1995) Subfamilial and tribal relationships in the Rubiaceae based on *rbcL* sequence data. *Ann Mo Bot Gard* 82: 383–397.
- Bremer B, Bremer K, Heidari N, Erixon P, Olmstead RG, Anderberg AA, Källersjö M, Barkhordarian E (2002) Phylogenetics of asterids based on 3 coding and 3 non-coding chloroplast DNA markers and the utility of non-coding DNA at higher taxonomic levels *Mol. Phylogenet Evol* 24: 274–301.
- Bremer B, Eriksson T (2009) Timetree of Rubiaceae – phylogeny and dating the family, subfamilies and tribes. *Int J Plant Sci* 170: 766–793.
- Bremer B, Jansen RK, Oxelman B, Backlund M, Lantz H, Kim KJ (1999) More characters or more taxa for a robust phylogeny – case study from the coffee family (Rubiaceae). *Syst Biol* 48: 413–435.
- Bremer B, Olmstead RG, Struwe L, Sweere JA (1994) *rbcL* sequences support exclusion of *Retzia*, *Desfontainia*, and *Nicodemia* from the Gentianales. *Plant Syst Evol* 190: 213–230.
- Bremer B, Thulin M (1998). Collapse of Isertiaea, re-establishment of Mussaendeae, and a new genus of Sabiceae (Rubiaceae); phylogenetic relationships based on *rbcL* data. *Plant Syst Evol* 211: 71–92.

## S1 Table – List of investigated taxa with accession numbers

- Chase MW, Soltis DE, Olmstead RG, Morgan D, Les DH, Mishler BD, Duvall MR, Price RA, Hills HG, Qiu YL, Kron KA, Rettig JH, Conti E, Palmer JD, Manhart JR, Sytsma KJ, Michaels HJ, Kress JW, Karol KG, Clark DW, Hedren M, Gaut BS, Jansen RK, Kim KJ, Wimpee CF, Smith JF, Furnier GR, Strauss SH, Xiang QY, Plunkett GM, Soltis PS, Swensen SM, Williams SE, Gadek PA, Quinn CJ, Equiarte LE, Golenberg E, Learn Jr GH, Graham SW, Barrett SCH, Dayanandan S, Albert VA (1993) Phylogenetics of seed plants: An analysis of nucleotide sequences from the plastid gene *rbcL*. *Ann Mo Bot Gard* 80: 528–580.
- Cosner ME, Jansen RK, Lammers TG (1994) Phylogenetic relationships in the Campanulales based on *rbcL* sequences *Plant Syst Evol* 190: 79–95.
- Dessein S, Andersson L, Robbrecht E, Smets E (2001) *Hekistocarpa* (Rubiaceae): a member of an emended tribe Virectarieae. *Plant Syst Evol* 229: 59–78.
- Endress ME, Sennblad B, Nilsson S, Civeyrel L, Chase MW, Huysmans S, Grafström E, Bremer B (1996) A phylogenetic analysis of Apocynaceae *s.str.* and some related taxa in Gentianales: a multidisciplinary approach. *Opera Bot Belg* 7: 59–102.
- Groeninckx I, Dessein S, Ochoterena H, Persson C, Motley TJ, Kårehed J, Bremer B, Huysmans S, Smets E (2009) Phylogeny of the herbaceous tribe Spermacoceae (Rubiaceae) based on plastid DNA data. *Ann Mo Bot Gard* 96: 109–132.
- Gustafsson MHG, Backlund A, Bremer B (1996) Phylogeny of the Asterales *sensu lato* based on *rbcL* sequences with particular reference to the Goodeniaceae. *Plant Syst Evol* 199: 217–242.
- Hedrén M, Chase MW, Olmstead RG (1995) Relationships in the Acanthaceae and related families as suggested by cladistic analysis of *rbcL* nucleotide sequences. *Plant Syst Evol* 194: 93–109.
- Hempel AL, Reeves PA, Olmstead RG, Jansen RK (1995) Implications of *rbcL* sequence data for higher order relationships of the Loasaceae and the anomalous aquatic plant *Hydrostachys* (Hydrostachyaceae). *Plant Syst Evol* 194: 25–37.
- Kainulainen K, Mouly A, Khodabandeh A, Bremer B (2009) Molecular phylogenetic analysis of the tribe Alberteae (Rubiaceae), with description of a new genus, *Razafimandimbisonia*. *Taxon* 58: 757–768.
- Kainulainen K, Persson C, Eriksson T, Bremer B (2010) Molecular systematics and morphological character evolution of the Condamineae (Rubiaceae). *Am J Bot* 97: 1961–1981.
- Kainulainen K, Razafimandimbison SG, Bremer B (2013) Phylogenetic relationships and new tribal delimitations in subfamily Ixoroideae (Rubiaceae). *Bot J Linn Soc* 173: 387–406.
- Kainulainen K, Bremer B (2014) Phylogeny of *Euclinia* and allied genera of Gardenieae (Rubiaceae), and description of *Melanoxerus*, an endemic genus of Madagascar. *Taxon* 63: 819–830.
- Källersjö M, Bergqvist G, Anderberg AA (2000) Generic realignment in primuloid families of the Ericales s.l.: a phylogenetic analysis based on DNA sequences from three chloroplast genes and morphology. *Am J Bot* 87: 1325–1341.
- Kanevski I, Maliga P, Rhoades DF, Gutteridge S (1999) Plastome engineering of ribulose-1,5 biphosphate carboxylase/oxygenase in tobacco to form a sunflower large subunit and tobacco small subunit hybrid. *Plant Physiol* 119: 133–141.
- Kårehed J (2001) Multiple origin of the tropical forest tree family Icacinaceae. *Am J Bot* 88: 2259–2274.
- Kårehed J, Bremer B (2007) The systematics of Knoxiaceae (Rubiaceae) – molecular data and their taxonomic consequences. *Taxon* 56: 1051–1076.
- Kårehed J, Lundberg J, Bremer B, Bremer K (1999) Evolution of the Australasian families Alseuosmiaceae, Argophyllaceae, and Phellinaceae. *Syst Bot* 24: 660–682.
- Kaufmann M, Wink M (1996) Phylogenetic relationships between some members of the subfamily Lamioideae family Labiatae inferred from nucleotide sequences of the *rbcL* gene. *Bot Acta* 109: 139–148.
- Kim KJ, Jansen RK (1995) *ndhF* sequence evolution and the major clades in the sunflower family. *Proc Natl Acad Sci USA* 9: 10379–10383.

## S1 Table – List of investigated taxa with accession numbers

- Koontz JA, Soltis DE (1999) DNA sequence data reveal polyphyly of Brexioidae Brexiaceae; Saxifragaceae sensu lato. *Plant Syst Evol* 219: 199–208.
- Kron KA, Chase MW (1983) Systematics of the Ericaceae, Empetraceae, Epacridaceae and related taxa based upon *rbcL* sequence data. *Ann Mo Bot Gard* 80: 735–741.
- Lantz H, Bremer B (2004) Phylogeny inferred from morphology and DNA data: characterizing well-supported groups in Vanguerieae (Rubiaceae). *Bot J Linn Soc* 146: 257–283.
- Laurent N, Bremer B, Bremer K (1998) Phylogeny and generic interrelationships of the Stylidiaceae (Asterales), with a possible extreme case of floral paedomorphosis. *Syst Bot* 23: 289–304.
- Lundberg J (2001) The Asteralean affinity of the Mauritian *Roussea* (Rousseaceae). *Bot J Linn Soc* 187: 267–276.
- Manen JF, Cuenoud P, Partinez MDP (1998) Intralineage variation in the pattern of *rbcL* nucleotide substitution. *Plant Syst Evol* 211: 103–112.
- Manns U, Bremer B (2010) Towards a better understanding of intertribal relationships and stable tribal delimitations within Cinchonoideae s.s. (Rubiaceae). *Mol Phylogenet Evol* 56: 21–39.
- Michaels HJ, Scott KM, Olmstead RG, Szaro T, K JR, Palmer JD (1993) Interfamilial relationships of the Asteraceae: insights from *rbcL* sequence variation. *Ann Mo Bot Gard* 80: 742–751.
- Morgan DR, Soltis DE (1993) Phylogenetic relationships among members of Saxifragaceae sensu lato based on *rbcL* sequence data. *Ann Mo Bot Gard* 80: 631–660.
- Morton CM, Chase MW, Kron KA, Swensen SM (1996) A molecular evaluation of the monophyly of the order Ebenales based upon *rbcL* sequence data. *Syst Bot* 21: 567–586.
- Morton CM, Mori SA, Prance GT, Karol KG, Chase MW (1997) Phylogenetic relationships of Lecythydaceae: A cladistic analysis using *rbcL* sequence and morphological data. *Am J Bot* 84: 530–540.
- Mouly A, Razafimandimbison SG, Achille F, Haevermans T, Bremer B (2007) Phylogenetic placement of *Rhopalobrachium fragrans* (Rubiaceae): Evidence from molecular (*rps16* and *trnTF*) and morphological data. *Syst Bot* 32: 872–882.
- Mouly A, Razafimandimbison SG, Florence J, Jeremie J, Bremer B (2009) Paraphyly of *Ixora* and new tribal delimitation of Ixoreae (Rubiaceae): Inference from combined chloroplast (*rps16*, *rbcL*, and *trnT-F*) sequence data. *Ann Mo Bot Gard* 96: 146–160.
- Nakamura K, Chung SW, Kokubugata G, Denda T, Yokota M (2006) Phylogenetic systematics of the monotypic genus *Hayataella* (Rubiaceae) endemic to Taiwan. *J Plant Res* 119: 657–661.
- Novotny V, Basset Y, Miller SE, Weiblen GD, Bremer B (2002) Low host specificity of herbivorous insects in a tropical forest. *Nature* 416: 841–844.
- Olmstead GR, Michaels JH, Scott MK, Palmer DJ (1992) Monophyly of the Asteridae and identification of their major lineages inferred from DNA sequences of *rbcL*. *Ann Mo Bot Gard* 79: 249–265.
- Olmstead RG, Bremer B, Scott KM, Palmer JD (1993) A parsimony analysis of the Asteridae sensu lato based on *rbcL* sequences. *Ann Mo Bot Gard* 80: 700–722.
- Olmstead RG, Kim KJ, Jansen RK, Wagstaff SJ (2000) The phylogeny of the Asteridae sensu lato based on chloroplast *ndhF* gene sequences. *Mol Phylogenet Evol* 16: 96–112.
- Olmstead RG, Reeves PA (1995) Evidence for the polyphyly of the Scrophulariaceae based on chloroplast *rbcL* and *ndhF* sequences. *Ann Mo Bot Gard* 82: 176–193.
- Oxelman B, Backlund M, Bremer B (1999) Relationships of Buddlejaceae s.l. investigated using parsimony jackknife and branch support analysis of chloroplast *ndhF* and *rbcL* sequence data. *Syst Bot* 24: 164–182.
- Piesschaert F, Andersson L, Jansen S, Dessein S, Robbrecht E, Smets E (2000) Searching for the taxonomic position of the African genus *Collettoecema* (Rubiaceae): morphology and anatomy compared to an *rps16*-intron analysis of the Rubioideae. *Can J Bot* 78: 288–304.
- Plunkett GM, Soltis DE, Soltis PS (1996) Higher level relationships of Apiales (Apiaceae and Araliaceae) based on phylogenetic analysis of *rbcL* sequences. *Am J Bot* 83: 499–515.
- Plunkett GM, Soltis DE, Soltis PS (1997) Clarification of the relationship between Apiaceae and Araliaceae based on *matK* and *rbcL* sequence data. *Am J Bot* 84: 565–580.
- Razafimandimbison SG, Bremer B (2002) Phylogeny and classification of Naucleae s.l. (Rubiaceae) inferred from molecular (ITS, *rbcL*, and *trnT-F*) and morphological data. *Am J Bot* 89: 1027–1041.
- Razafimandimbison SG, Kainulainen K, Wong KM, Beaver K, Bremer B (2011) Molecular support for a basal grade of morphologically distinct, monotypic genera in the species-rich Vanguerieae

## S1 Table – List of investigated taxa with accession numbers

- alliance (Rubiaceae, Ixoroideae): its systematic and conservation implications. *Taxon* 60: 941–952.
- Razafimandimbison SG, McDowell TD, Halford DA, Bremer B (2009) Molecular phylogenetics and generic assessment in the tribe Morindeae (Rubiaceae-Rubioideae): how to circumscribe *Morinda* L. to be monophyletic? *Mol Phylogenet Evol* 52: 879–886.
- Razafimandimbison SG, Rydin C, Bremer B (2008) Evolution and trends in the Psychotrieae alliance (Rubiaceae) – a rarely reported evolutionary change of many-seeded carpels from one-seeded carpels. *Mol Phylogenet Evol* 48: 207–223.
- Rova JHE, Delprete PG, Andersson L, Albert VA (2002) A *trnL-F* cpDNA sequence study of the Condamineae-Rondeletieae-Sipaneeae complex with implications on the phylogeny of the Rubiaceae. *Am J Bot* 89: 145–159.
- Rydin C, Kainulainen K, Razafimandimbison SG, Smedmark JEE, Bremer B (2008) Rare and enigmatic genera (*Dunnia*, *Schizocolea*, *Colletocema*), sisters to species-rich clades: phylogeny and aspects of conservation biology in the coffee family. *Mol Phylogenet Evol* 48: 74–83.
- Rydin C, Razafimandimbison SG, Khodabandeh A, Bremer B (2009) Evolutionary relationships in the Spermaceae alliance (Rubiaceae) using information from six molecular loci: insights into systematic affinities of *Neohymenopogon* and *Mouretia*. *Taxon* 58: 793–810.
- Savolainen V, Chase MW, Morton CM, Hoot SB, Soltis DE, Bayer C, Fay MF, de Bruijn A, Sullivan S, Qiu YL (2000a) Phylogenetics of flowering plants based upon a combined analysis of plastid *atpB* and *rbcL* gene sequences. *Syst Biol* 49: 306–362.
- Savolainen V, Fay MF, Albach DC, Backlund A, van der Bank M, Cameron KM, Johnson SA, Lledó MD, Pinaud JC, Powell M, Sheahan MC, Soltis DE, Soltis PS, Weston P, Whitten WM, Wurdack KJ, Chase MW (2000b) Phylogeny of the eudicots: a nearly complete familial analysis based on *rbcL* gene sequences. *Kew Bull* 55: 257–309.
- Sennblad B, Bremer B (1996) The familial and subfamilial relationships of Apocynaceae and Asclepiadaceae evaluated with *rbcL* data. *Plant Syst Evol* 129: 187–190.
- Shinozaki K, Ohme M, Tanaka M, Wakasugi T, Hayashida N, Matsubayashi T, Zaita N, Chunwongse J, Obokata J, Yamaguchi-Shinozaki K, Ohto C, Torazawa K, Meng BY, Sugita M, Deno H, Kamogashira T, Yamada K, Kusuda J, Takaiwa F, Kato A, Tohdoh N, Shimada H, Sugiura M (1986). The complete nucleotide sequence of the tobacco chloroplast genome: its gene organization and expression. *EMBO J* 5: 2043–2049.
- Spangler RE, Olmstead RG (1999). Phylogenetic analysis of Bignoniaceae based on the cpDNA gene sequences *rbcL* and *ndhF*. *Ann Mo Bot Gard* 86: 33–46.
- Struwe L, Thiv M, Kadereit JW, Pepper ASR, Motley TJ, White PJ, Rova JHE, Potgeiter K, Albert VA (1998). *Saccifolium* (Saccifoliaceae), an endemic of Sierra de la Neblina on the Brazilian-Venezuelan border, is related to a temperate-alpine lineage of Gentianaceae *Harv Pap Bot* 3: 199–214.
- Thiers B (2008) [continuously updated]. Index Herbariorum: A global directory of public herbaria and associated staff. New York Botanical Garden's Virtual Herbarium. <http://sweetgum.nybg.org/ih/>.
- Wagstaff SJ, Olmstead RG (1997) Phylogeny of the Labiatae and Verbenaceae, inferred from *rbcL* sequences. *Syst Bot* 22: 165–179.
- Wen H-Z, Wang R-J (2012) *Foonchewia guangdongensis* gen. et sp. nov. (Rubioideae: Rubiaceae) and its systematic position inferred from chloroplast sequences and morphology. *J Syst Evol* 50: 467–476.
- Xiang Q, Soltis DE, Morgan DR, Soltis PS (1993) Phylogenetic relationships of *Cornus* L. sensu lato and putative relatives inferred from *rbcL* sequence data. *Ann Mo Bot Gard* 80: 723–734.
