# Supplementary material for: A Revised Time Tree of the Asterids: Establishing a Temporal Framework For Evolutionary Studies of the Coffee Family (Rubiaceae)
Source: PubMed Central journal article supplement (PMC4462594; doi:10.1371/journal.pone.0126690), 2015-05-21
Supplement: pone.0126690.s003.pdf [file pone.0126690.s003.pdf]

S2 Table – Estimated ages for all nodes obtained in the separate and in the combined analyses

S2 Table. Estimated ages for all nodes obtained in the separate and in the combined analyses. Credibility intervals are indicated by 95% highest probability density (HPD) for each node. Node numbers sometimes differ between the two analyses but estimates given on the same row concern the same group of taxa in each of the analyses. Nodes present in the results of one of the analysis, but with no correspondence in the other, are indicated with nc. Node numbers in the separate analysis refer to numbered nodes in (Figs. 1 and 2) and node numbers in the combined analysis refer to numbered nodes in (Figs. 3 and 4). Node 42 (Gentianales crown group) and nodes 110, 111, and 112 all have two age estimates reported from the separate analysis, one from the asterid analysis and one from the analysis of the Gentianales.

| Ages from the separate analysis (Figs. 1 and 2) |               |             |                        | Ages from the combined analysis (Figs. 3 and 4) |               |             |                        |
|-------------------------------------------------|---------------|-------------|------------------------|-------------------------------------------------|---------------|-------------|------------------------|
| Node number                                     | Clade/taxon   | Lineage age | 95% HPD of lineage age | Node Number                                     | Clade/taxon   | Lineage age | 95% HPD of lineage age |
| 1                                               |               | 127         | 123-128                | 1                                               |               | 127         | 124-128                |
| 2                                               | Asterids      | 125         | 121-128                | 2                                               | Asterids      | 126         | 122-128                |
| 3                                               |               | 122         | 117-126                | 3                                               |               | 123         | 119-126                |
| 4                                               | Core Asterids | 116         | 109-122                | 4                                               | Core Asterids | 119         | 113-123                |
| 5                                               | Lamiids       | 109         | 99-117                 | 5                                               | Lamiids       | 114         | 107-120                |
| 6                                               |               | 107         | 97-115                 | 6                                               |               | 112         | 106-118                |
| 7                                               | Core Lamiids  | 98          | 87-107                 | 7                                               | Core Lamiids  | 105         | 98-112                 |
| 8                                               |               | 95          | 84-104                 | 8                                               |               | 102         | 95-109                 |
| 9                                               |               | 92          | 81-103                 | 9                                               |               | 99          | 89-108                 |
| 10                                              | Solanales     | 82          | 64-96                  | 10                                              | Solanales     | 90          | 75-102                 |
| 11                                              |               | 71          | 50-89                  | 11                                              |               | 78          | 58-94                  |
| 12                                              |               | 38          | 21-61                  | 12                                              |               | 40          | 23-60                  |
| 13                                              |               | 24          | 9-42                   | 13                                              |               | 23          | 9-42                   |
| 14                                              |               | 59          | 35-80                  | 14                                              |               | 70          | 49-89                  |
| 15                                              |               | 91          | 80-101                 | 15                                              |               | 97          | 88-105                 |
| 16                                              | Lamiales      | 82          | 71-93                  | 16                                              | Lamiales      | 87          | 77-96                  |
| 17                                              |               | 75          | 65-85                  | 17                                              |               | 79          | 69-89                  |
| 18                                              |               | 71          | 61-82                  | 18                                              |               | 74          | 64-84                  |
| 19                                              |               | 62          | 53-71                  | 19                                              |               | 65          | 56-76                  |
| 20                                              |               | 58          | 51-69                  | 20                                              |               | 62          | 53-72                  |
| 21                                              |               | 55          | 47-64                  | 21                                              |               | 58          | 49-67                  |
| 22                                              |               | 52          | 44-60                  | 22                                              |               | 55          | 47-64                  |
| 23                                              |               | 48          | 41-57                  | 23                                              |               | 51          | 44-60                  |
| 24                                              |               | 47          | 40-56                  | nc                                              |               | nc          | nc                     |
| 25                                              |               | 40          | 30-51                  | 24                                              |               | 44          | 33-54                  |
| 26                                              |               | 38          | 27-48                  | 25                                              |               | 40          | 28-51                  |
| 27                                              |               | 25          | 13-37                  | 26                                              |               | 26          | 13-38                  |
| nc                                              |               | nc          | nc                     | 27                                              |               | 49          | 41-57                  |
| 28                                              |               | 44          | 37-52                  | 28                                              |               | 46          | 39-53                  |
| 29                                              |               | 42          | 34-50                  | nc                                              |               | nc          | nc                     |
| nc                                              |               | nc          | nc                     | 29                                              |               | 44          | 37-52                  |
| 30                                              |               | 29          | 18-41                  | 30                                              |               | 32          | 17-42                  |
| 31                                              |               | 42          | 36-51                  | nc                                              |               | nc          | nc                     |
| nc                                              |               | nc          | nc                     | 31                                              |               | 39          | 34-47                  |
| 32                                              |               | 38          | 28-48                  | nc                                              |               | nc          | nc                     |
| nc                                              |               | nc          | nc                     | 32                                              |               | 42          | 35-50                  |

S2 Table – Estimated ages for all nodes obtained in the separate and in the combined analyses

| Ages from the separate analysis (Figs. 1 and 2) |                                   |             |                        | Ages from the combined analysis (Figs. 3 and 4) |                                   |             |                        |
|-------------------------------------------------|-----------------------------------|-------------|------------------------|-------------------------------------------------|-----------------------------------|-------------|------------------------|
| Node number                                     | Clade/taxon                       | Lineage age | 95% HPD of lineage age | Node Number                                     | Clade/taxon                       | Lineage age | 95% HPD of lineage age |
| 33                                              |                                   | 39          | 28-48                  | 33                                              |                                   | 39          | 34-46                  |
| 34                                              |                                   | 46          | 34-57                  | 34                                              |                                   | 50          | 38-61                  |
| 38                                              |                                   | 48          | 35-61                  | 38                                              |                                   | 50          | 37-62                  |
| 40                                              |                                   | 49          | 30-64                  | 40                                              |                                   | 52          | 32-68                  |
| 41                                              |                                   | 36          | 17-57                  | 41                                              |                                   | 39          | 18-61                  |
| 42 <sup>1</sup>                                 | Gentianales                       | 70          | 50-88                  | 42                                              | Gentianales                       | 96          | 87-104                 |
| 42 <sup>2</sup>                                 | Gentianales                       | 96          | 82-110                 | -                                               | -                                 | -           | -                      |
| 43                                              | Rubiaceae                         | 92          | 78-106                 | 43                                              | Rubiaceae                         | 87          | 79-96                  |
| 44                                              |                                   | 80          | 63-98                  | 44                                              |                                   | 78          | 67-89                  |
| 45                                              | Ixoroideae                        | 64          | 45-82                  | 45                                              | Ixoroideae                        | 59          | 48-73                  |
| 46                                              | Sabiceae (stem)                   | 60          | 43-78                  | 46                                              |                                   | 57          | 46-70                  |
| 47                                              | Mussaendeae (stem)                | 56          | 40-74                  | nc                                              |                                   | nc          | nc                     |
| 48                                              | Stenisieae (stem)                 | 50          | 35-67                  | 47                                              | Stenisieae (stem)                 | 51          | 40-63                  |
| 49                                              | Retiniphyllae (stem)              | 41          | 29-57                  | 48                                              | Retiniphyllae (stem)              | 42          | 33-53                  |
| 50                                              | Vanguerieae + Coffeae alliances   | 35          | 24-49                  | 49                                              | Vanguerieae + Coffeae alliances   | 36          | 28-45                  |
| 51                                              | Airospermeae (stem)               | 30          | 19-44                  | 50                                              | Airospermeae (stem)               | 32          | 24-41                  |
| 52                                              | Augusteae (stem)                  | 24          | 13-36                  | 51                                              | Augusteae (stem)                  | 25          | 18-33                  |
| 53                                              | Alberteae (stem)                  | 21          | 11-32                  | 52                                              | Alberteae (stem)                  | 23          | 17-32                  |
| 54                                              |                                   | 16          | 9-26                   | 53                                              |                                   | 18          | 12-25                  |
| 55                                              | Octotropideae (stem)              | 14          | 7-23                   | 54                                              | Octotropideae (stem)              | 16          | 10-23                  |
| 56                                              |                                   | 12          | 5-20                   | 55                                              |                                   | 15          | 9-21                   |
| 57                                              | Gardenieae/Pavetteae (stem)       | 9           | 3-17                   | 56                                              | Gardenieae/Pavetteae (stem)       | 13          | 7-20                   |
| 58                                              | Sherbournieae/Cordiereae (stem)   | 9           | 4-17                   | 57                                              | Sherbournieae/Cordiereae (stem)   | 13          | 7-20                   |
| 59                                              | Coffeae/Bertiareae (stem)         | 9           | 3-18                   | 58                                              | Coffeae/Bertiareae (stem)         | 12          | 6-18                   |
| 60                                              | Crossopterygeae (stem)            | 31          | 21-43                  | 59                                              | Crossopterygeae (stem)            | 32          | 25-41                  |
| 61                                              | Jackieae (stem)                   | 26          | 17-38                  | 60                                              | Jackieae (stem)                   | 28          | 21-36                  |
| 62                                              | Scyphiphoreae (stem)              | 23          | 16-34                  | 61                                              | Scyphiphoreae (stem)              | 26          | 18-34                  |
| 63                                              | Trillaeodoxeae (stem)             | 21          | 13-32                  | 62                                              | Trillaeodoxeae (stem)             | 24          | 17-32                  |
| 64                                              |                                   | 19          | 11-30                  | 63                                              | Vanguerieae (stem)                | 23          | 16-31                  |
| nc                                              |                                   | nc          | nc                     | 64                                              |                                   | 22          | 15-30                  |
| 65                                              | Vanguerieae (stem)                | 17          | 10-27                  | nc                                              |                                   | nc          | nc                     |
| 66                                              | Greeneae (stem)                   | 13          | 6-21                   | 65                                              | Greeneae (stem)                   | 16          | 9-24                   |
| 67                                              | Ixoreae/Aleisanthieae (stem)      | 8           | 3-16                   | 66                                              | Ixoreae/Aleisanthieae (stem)      | 12          | 5-19                   |
| nc                                              |                                   | nc          | nc                     | 67                                              | Mussaendeae (stem)                | 54          | 41-67                  |
| 68                                              | Sabiceae                          | 13          | 3-34                   | 68                                              | Sabiceae                          | 16          | 5-33                   |
| 69                                              | Condamineae (stem)                | 48          | 21-75                  | 69                                              | Condamineae (stem)                | 56          | 43-70                  |
| 70                                              | Condamineae                       | 18          | 4-43                   | 70                                              | Condamineae                       | 19          | 7-35                   |
| 71                                              |                                   | 11          | 3-29                   | 71                                              |                                   | 16          | 5-32                   |
| 72                                              | Sipaneae (stem)                   | 28          | 10-54                  | 72                                              | Sipaneae (stem)                   | 41          | 20-59                  |
| 73                                              | Posoquerieae/Henriquezieae (stem) | 13          | 3-33                   | 73                                              | Posoquerieae/Henriquezieae (stem) | 21          | 7-39                   |

S2 Table – Estimated ages for all nodes obtained in the separate and in the combined analyses

| Ages from the separate analysis (Figs. 1 and 2) |                                       |             |                        | Ages from the combined analysis (Figs. 3 and 4) |                                       |             |                        |
|-------------------------------------------------|---------------------------------------|-------------|------------------------|-------------------------------------------------|---------------------------------------|-------------|------------------------|
| Node number                                     | Clade/taxon                           | Lineage age | 95% HPD of lineage age | Node Number                                     | Clade/taxon                           | Lineage age | 95% HPD of lineage age |
| 74                                              | Cinchonoideae                         | 58          | 42-76                  | 74                                              | Cinchonoideae                         | 51          | 42-64                  |
| 75                                              |                                       | 53          | 40-70                  | 75                                              |                                       | 51          | 41-63                  |
| 76                                              |                                       | 50          | 39-65                  | 76                                              |                                       | 49          | 40-61                  |
| 77                                              | Chiococceae (stem)                    | 38          | 15-56                  | 77                                              | Chiococceae (stem)                    | 44          | 30-59                  |
| 78                                              | Hillieae/Hamelieae (stem)             | 17          | 5-38                   | 78                                              | Hillieae/Hamelieae (stem)             | 22          | 8-40                   |
| 79                                              | Hymenodictyeae/Naucleaeae (stem)      | 38          | 34-48                  | 79                                              | Hymenodictyeae/Naucleaeae (stem)      | 36          | 34-44                  |
| 80                                              | Rondeletieae/Guettardeae (stem)       | 26          | 6-49                   | 80                                              | Rondeletieae/Guettardeae (stem)       | 32          | 13-51                  |
| 81                                              | Isertieae/Cinchoneae (stem)           | 28          | 6-59                   | 81                                              | Isertieae/Cinchoneae (stem)           | 39          | 20-57                  |
| 82                                              | Luculieae (stem)                      | 89          | 75-103                 | 82                                              | Luculieae (stem)                      | 85          | 77-94                  |
| 83                                              | Coptosapelteae (stem)                 | 86          | 73-101                 | 83                                              | Coptosapelteae (stem)                 | 84          | 76-93                  |
| 84                                              | Rubioideae                            | 76          | 63-90                  | 84                                              | Rubioideae                            | 76          | 67-85                  |
| 85                                              |                                       | 75          | 63-88                  | 85                                              |                                       | 74          | 65-84                  |
| 86                                              | Ophiorhizeae (stem)                   | 71          | 60-84                  | 86                                              | Ophiorhizeae (stem)                   | 71          | 63-81                  |
| 87                                              | Coussareeae (stem)                    | 63          | 53-74                  | 87                                              | Coussareeae (stem)                    | 63          | 55-72                  |
| 88                                              | Psychotrieae + Spermacoceae alliances | 60          | 50-70                  | 88                                              | Psychotrieae + Spermacoceae alliances | 60          | 52-69                  |
| 89                                              | Spermacoceae alliance                 | 48          | 36-59                  | 89                                              | Spermacoceae alliance                 | 48          | 38-60                  |
| 90                                              | Anthospermeae (stem)                  | 42          | 30-55                  | 90                                              | Anthospermeae (stem)                  | 44          | 34-55                  |
| 91                                              |                                       | 37          | 26-50                  | 91                                              |                                       | 40          | 30-51                  |
| 92                                              | Argostemmateae (stem)                 | 29          | 13-42                  | nc                                              |                                       | nc          | nc                     |
| nc                                              |                                       | nc          | nc                     | 92                                              |                                       | 36          | 24-48                  |
| 93                                              | Dunnieae/Foonchewieae (stem)          | 17          | 4-34                   | 93                                              | Dunnieae/Foonchewieae (stem)          | 29          | 10-42                  |
| 94                                              | Paederieae (stem)                     | 33          | 22-45                  | nc                                              |                                       | nc          | nc                     |
| nc                                              |                                       | nc          | nc                     | 94                                              | Paederieae (stem)                     | 31          | 17-42                  |
| 95                                              | Putorieae (stem)                      | 23          | 13-34                  | 95                                              | Paederieae (stem)                     | 28          | 19-38                  |
| 96                                              | Rubieae/Theligoneae (stem)            | 18          | 9-29                   | 96                                              | Rubieae/Theligoneae (stem)            | 23          | 15-33                  |
| 97                                              | Danaideae (stem)                      | 43          | 28-56                  | 97                                              | Danaideae (stem)                      | 45          | 35-57                  |
| 98                                              | Knoxieae/Spermacoceae (stem)          | 35          | 22-50                  | 98                                              | Knoxieae/Spermacoceae (stem)          | 39          | 27-52                  |
| 99                                              | Spermacoceae                          | 20          | 9-33                   | 99                                              | Spermacoceae                          | 23          | 11-35                  |
| 100                                             | Psychotrieae alliance                 | 54          | 46-63                  | 100                                             | Psychotrieae alliance                 | 53          | 46-62                  |
| 100                                             | Schizocoleae (stem)                   | 54          | 46-63                  | 100                                             | Schizocoleae (stem)                   | 53          | 46-62                  |
| 101                                             | Craterispermeae (stem)                | 51          | 44-60                  | 101                                             | Craterispermeae (stem)                | 50          | 44-58                  |
| 102                                             | Prismatomerideae (stem)               | 49          | 43-57                  | 102                                             | Prismatomerideae (stem)               | 48          | 42-55                  |
| 103                                             |                                       | 46          | 41-53                  | 103                                             |                                       | 44          | 39-50                  |
| 104                                             | Schradereae (stem)                    | 43          | 39-49                  | 104                                             | Schradereae (stem)                    | 42          | 38-47                  |
| 105                                             | Gaertnereae (stem)                    | 41          | 39-47                  | 105                                             | Gaertnereae (stem)                    | 42          | 39-47                  |
| 106                                             | Mitchelleae/Morindeae (stem)          | 39          | 38-43                  | 106                                             | Mitchelleae/Morindeae (stem)          | 39          | 38-43                  |
| 107                                             | Palicourieae/Psychotrieae (stem)      | 33          | 19-44                  | 107                                             | Palicourieae/Psychotrieae (stem)      | 32          | 21-42                  |
| 108                                             | Psychotrieae                          | 13          | 4-25                   | 108                                             | Psychotrieae                          | 15          | 6-26                   |

S2 Table – Estimated ages for all nodes obtained in the separate and in the combined analyses

| Ages from the separate analysis (Figs. 1 and 2) |                                     |             |                        | Ages from the combined analysis (Figs. 3 and 4) |                                     |             |                        |
|-------------------------------------------------|-------------------------------------|-------------|------------------------|-------------------------------------------------|-------------------------------------|-------------|------------------------|
| Node number                                     | Clade/taxon                         | Lineage age | 95% HPD of lineage age | Node Number                                     | Clade/taxon                         | Lineage age | 95% HPD of lineage age |
| 109                                             | Colletocemateae/Lasi-antheae (stem) | 51          | 20-77                  | 109                                             | Colletocemateae/Lasi-antheae (stem) | 67          | 52-81                  |
| 110 <sup>1</sup>                                |                                     | 56          | 39-74                  | 110                                             |                                     | 73          | 49-93                  |
| 110 <sup>2</sup>                                |                                     | 61          | 35-89                  | –                                               |                                     | –           | –                      |
| 111 <sup>1</sup>                                |                                     | 46          | 34-65                  | 111                                             |                                     | 62          | 39-86                  |
| 111 <sup>2</sup>                                |                                     | 45          | 25-73                  | –                                               |                                     | –           | –                      |
| 112 <sup>1</sup>                                |                                     | 49          | 31-70                  | 112                                             |                                     | 64          | 39-87                  |
| 112 <sup>2</sup>                                |                                     | 43          | 19-73                  | –                                               |                                     | –           | –                      |
| 113                                             |                                     | 104         | 93-114                 | 113                                             |                                     | 110         | 100-117                |
| 114                                             |                                     | 96          | 76-110                 | 114                                             |                                     | 102         | 74-115                 |
| 116                                             |                                     | 104         | 86-117                 | 116                                             |                                     | 110         | 95-119                 |
| 117                                             | Campanulids                         | 110         | 100-118                | 117                                             | Campanulids                         | 112         | 104-119                |
| 118                                             | Core Campanulids                    | 99          | 89-109                 | 118                                             | Core Campanulids                    | 101         | 90-110                 |
| 119                                             |                                     | 96          | 87-107                 | 119                                             |                                     | 99          | 89-110                 |
| 120                                             |                                     | 91          | 77-105                 | nc                                              |                                     | nc          | nc                     |
| 121                                             |                                     | 84          | 63-100                 | 120                                             |                                     | 88          | 67-104                 |
| nc                                              |                                     | nc          | nc                     | 121                                             |                                     | 81          | 53-100                 |
| 122                                             |                                     | 80          | 60-97                  | nc                                              |                                     | nc          | nc                     |
| nc                                              |                                     | nc          | nc                     | 122                                             |                                     | 81          | 56-100                 |
| 123                                             |                                     | 70          | 47-91                  | nc                                              |                                     | nc          | nc                     |
| nc                                              |                                     | nc          | nc                     | 123                                             |                                     | 97          | 86-107                 |
| 124                                             |                                     | 92          | 82-104                 | 124                                             |                                     | 94          | 83-104                 |
| 126                                             | Asterales                           | 81          | 71-93                  | 126                                             | Asterales                           | 82          | 71-94                  |
| 127                                             |                                     | 78          | 68-89                  | 127                                             |                                     | 78          | 68-91                  |
| 128                                             |                                     | 72          | 62-83                  | 128                                             |                                     | 73          | 62-84                  |
| 129                                             |                                     | 70          | 61-80                  | 129                                             |                                     | 71          | 61-82                  |
| 130                                             |                                     | 64          | 56-74                  | 130                                             |                                     | 65          | 56-76                  |
| 131                                             |                                     | 54          | 49-62                  | 131                                             |                                     | 55          | 49-63                  |
| 132                                             |                                     | 49          | 47-55                  | 132                                             |                                     | 49          | 47-56                  |
| 133                                             |                                     | 22          | 8-39                   | 133                                             |                                     | 22          | 7-40                   |
| 134                                             |                                     | 62          | 39-78                  | 134                                             |                                     | 63          | 43-80                  |
| 135                                             |                                     | 56          | 30-73                  | nc                                              |                                     | nc          | nc                     |
| nc                                              |                                     | nc          | nc                     | 135                                             |                                     | 57          | 33-75                  |
| 136                                             |                                     | 94          | 82-107                 | 136                                             |                                     | 96          | 84-107                 |
| 137                                             | Apiales                             | 67          | 56-82                  | 137                                             | Apiales                             | 67          | 56-83                  |
| 138                                             |                                     | 61          | 49-79                  | 138                                             |                                     | 61          | 49-79                  |
| 139                                             |                                     | 49          | 38-64                  | 139                                             |                                     | 49          | 41-64                  |
| 140                                             |                                     | 44          | 30-61                  | 140                                             |                                     | 43          | 30-61                  |
| 141                                             |                                     | 23          | 10-45                  | 141                                             |                                     | 22          | 8-41                   |
| 143                                             |                                     | 90          | 77-103                 | 143                                             |                                     | 92          | 79-104                 |
| 144                                             | Dipsacales                          | 79          | 63-94                  | 144                                             | Dipsacales                          | 80          | 65-94                  |
| 145                                             |                                     | 59          | 47-74                  | 145                                             |                                     | 62          | 49-76                  |
| 146                                             |                                     | 50          | 40-63                  | 146                                             |                                     | 52          | 41-64                  |
| 147                                             |                                     | 38          | 34-46                  | 147                                             |                                     | 39          | 34-48                  |

S2 Table – Estimated ages for all nodes obtained in the separate and in the combined analyses

| Ages from the separate analysis (Figs. 1 and 2) |              |             |                        | Ages from the combined analysis (Figs. 3 and 4) |              |             |                        |
|-------------------------------------------------|--------------|-------------|------------------------|-------------------------------------------------|--------------|-------------|------------------------|
| Node number                                     | Clade/taxon  | Lineage age | 95% HPD of lineage age | Node Number                                     | Clade/taxon  | Lineage age | 95% HPD of lineage age |
| 148                                             |              | 35          | 25-46                  | 148                                             |              | 34          | 22-47                  |
| 149                                             |              | 29          | 18-39                  | 149                                             |              | 31          | 22-41                  |
| 150                                             |              | 80          | 41-99                  | 150                                             |              | 78          | 32-98                  |
| 151                                             | Aquifoliales | 97          | 80-111                 | 151                                             | Aquifoliales | 100         | 84-112                 |
| 152                                             |              | 71          | 62-89                  | 152                                             |              | 72          | 62-90                  |
| 153                                             |              | 58          | 33-82                  | 153                                             |              | 59          | 32-82                  |
| 154                                             | Ericales     | 111         | 104-119                | 154                                             | Ericales     | 109         | 100-117                |
| 155                                             |              | 104         | 97-111                 | 155                                             |              | 99          | 94-106                 |
| 156                                             |              | 102         | 96-110                 | 156                                             |              | 97          | 92-103                 |
| 157                                             |              | 100         | 92-109                 | 157                                             |              | 95          | 87-103                 |
| 158                                             |              | 85          | 58-102                 | 158                                             |              | 81          | 50-98                  |
| 159                                             |              | 97          | 84-108                 | 159                                             |              | 92          | 79-101                 |
| 160                                             |              | 93          | 77-105                 | 160                                             |              | 88          | 74-99                  |
| 161                                             |              | 62          | 40-83                  | 161                                             |              | 55          | 35-73                  |
| 162                                             |              | 38          | 20-58                  | 162                                             |              | 32          | 16-50                  |
| 163                                             |              | 101         | 95-108                 | 163                                             |              | 95          | 91-101                 |
| 164                                             |              | 98          | 93-104                 | 164                                             |              | 92          | 90-97                  |
| 166                                             |              | 100         | 91-109                 | 166                                             |              | 96          | 88-103                 |
| 167                                             |              | 98          | 89-107                 | nc                                              |              | nc          | nc                     |
| 168                                             |              | 89          | 78-99                  | 167                                             |              | 86          | 77-95                  |
| 169                                             |              | 77          | 72-88                  | 168                                             |              | 76          | 72-85                  |
| 170                                             |              | 73          | 72-88                  | 169                                             |              | 71          | 44-89                  |
| nc                                              |              | nc          | nc                     | 170                                             |              | 92          | 80-102                 |
| 171                                             |              | 39          | 13-75                  | 173                                             |              | 45          | 14-77                  |
| 172                                             |              | 93          | 72-107                 | 171                                             |              | 88          | 67-101                 |
| 173                                             |              | 48          | 15-83                  | 172                                             |              | 44          | 14-77                  |
| 174                                             |              | 62          | 37-87                  | 174                                             |              | 59          | 38-85                  |
| 175                                             |              | 53          | 28-75                  | 175                                             |              | 51          | 30-77                  |
| 176                                             |              | 32          | 13-54                  | 176                                             |              | 31          | 13-53                  |
| 177                                             | Cornales     | 103         | 90-118                 | 177                                             | Cornales     | 102         | 90-117                 |
| 178                                             |              | 96          | 73-118                 | 178                                             |              | 93          | 57-117                 |

<sup>1</sup> Estimate obtained in the asterid analysis<sup>2</sup> Estimate obtained in the Gentianales analysis
